1     **Modeling microbial cross-feeding at intermediate scale portrays community**  
2                                     **dynamics and species coexistence**

3                     Chen Liao<sup>1</sup>, Tong Wang<sup>2,3</sup>, Sergei Maslov<sup>3,4</sup>, Joao B. Xavier<sup>1,\*</sup>

4  
5     <sup>1</sup>Program for Computational and Systems Biology, Memorial Sloan-Kettering Cancer Center, New  
6     York, NY, United States of America, <sup>2</sup>Department of Physics, University of Illinois at Urbana-  
7     Champaign, IL 61801, USA, <sup>3</sup>Carl R. Woese Institute for Genomic Biology, University of Illinois  
8     at Urbana-Champaign, IL 61801, USA, <sup>4</sup>Department of Bioengineering, University of Illinois at  
9     Urbana-Champaign, IL 61801, USA

10

11     \*To whom correspondence may be addressed: J. Xavier (Email: [XavierJ@mskcc.org](mailto:XavierJ@mskcc.org))

12

13     Keywords:

14     cross-feeding; coarse-grained modeling; microbial community; ecological relationship; species  
15     coexistence; population dynamics

## 16 **Abstract**

17 Social interaction between microbes can be described at many levels of details, ranging from the  
18 biochemistry of cell-cell interactions to the ecological dynamics of populations. Choosing the best  
19 level to model microbial communities without losing generality remains a challenge. Here we  
20 propose to model cross-feeding interactions at an intermediate level between genome-scale  
21 metabolic models of individual species and consumer-resource models of ecosystems, which is  
22 suitable to empirical data. We applied our method to three published examples of multi-strain  
23 *Escherichia coli* communities with increasing complexity consisting of uni-, bi-, and multi-  
24 directional cross-feeding of either substitutable metabolic byproducts or essential nutrients. The  
25 intermediate-scale model accurately described empirical data and could quantify exchange rates  
26 elusive by other means, such as the byproduct secretions, even for a complex community of 14  
27 amino acid auxotrophs. We used the three models to study each community's limits of robustness  
28 to perturbations such as variations in resource supply, antibiotic treatments and invasion by other  
29 "cheaters" species. Our analysis provides a foundation to quantify cross-feeding interactions from  
30 experimental data, and highlights the importance of metabolic exchanges in the dynamics and  
31 stability of microbial communities.

## 32 **Significance statement**

33 The behavior of complex multispecies communities such as the human microbiome is hard to  
34 predict by its composition alone. Our efforts to engineer such communities would benefit from  
35 mechanistic models that accurately describe how microbes exchange metabolites with each other  
36 and how their environment shapes these exchanges. But what is the most appropriate level of  
37 details to model microbial interaction? We propose an intermediate level to model metabolic  
38 exchanges that accurately describes population dynamics and stability of microbial communities.  
39 We demonstrate this approach by constraining models with experimental data from three  
40 laboratory communities with increasing levels of complexity. Each model allows us to predict  
41 metabolic byproduct leakage fractions as well as how external perturbations such as nutrient  
42 variations or addition of antibiotics impact those communities. Our work paves the way to model  
43 real-world applications including precise engineering of the microbiome to improve human health.

## 44 **Introduction**

45 Most microorganisms that affect the environments we live in<sup>1</sup> and that impact our health<sup>2</sup> do not  
46 live in isolation: they live in complex communities where they interact with other strains and  
47 species. The past decade has seen a surge of scientific interest in microbial communities, such as  
48 the human microbiome, but most studies remain limited to cataloguing community composition<sup>3</sup>.  
49 Our mechanistic understanding of how biochemical processes occurring inside individual  
50 microbial cells command the interactions occurring between cells, and lead to the emergent  
51 properties of multi-species communities remains limited<sup>4</sup>.

52 Microorganisms consume, transform and secrete many kinds of chemicals, including  
53 nutrients, metabolic waste products, extracellular enzymes, antibiotics and cell-cell signaling  
54 molecules such as quorum sensing autoinducers<sup>5,6</sup>. The chemicals produced by one microbe can  
55 impact the behaviors of other microbes by promoting or inhibiting their growth<sup>7</sup>, creating multi-  
56 directional feedbacks that drive ecological interactions which may be beneficial or detrimental to  
57 the partners involved<sup>8,9</sup>.

58 If a community is well-characterized and given sufficient data on population dynamics, it  
59 should be possible to parameterize the underlying metabolic processes involved in microbe-  
60 microbe interactions by fitting mathematical models<sup>10</sup>. Any model can potentially yield insights<sup>11</sup>,  
61 but the complexity of most models so far has been either too high for parameterization, or too low  
62 to shed light on cellular mechanisms. Microbial processes may be modelled across a range of  
63 details: At the low end of this spectrum of details we have population dynamic models such as  
64 generalized Lotka-Volterra (gLV)<sup>12</sup> and Consumer-Resource (C-R) models<sup>13</sup>, which treat each  
65 organism as a ‘black-box’ at the cellular level. For example, C-R models assume a linear or Monod  
66 dependence of microbial growth on resource uptake kinetics. At the high end of this spectrum, we

67 have detailed single-cell models such as dynamic flux balance analysis (dFBA)<sup>14</sup> and agent-based  
68 models<sup>15</sup> that have too many parameters to be parameterizable by experimental data. For example,  
69 the linear equations for fluxes obtained from quasi-steady-state assumption of dFBA are highly  
70 underdetermined. What is the appropriate level of details to model and constrain microbial  
71 processes using data, that may produce not only accurate predictions but also mechanistic insights  
72 on microbial communities?

73 Here we propose a generalizable framework that couples classical ecological models of  
74 population and resource dynamics with coarse-grained intra-species metabolic networks. We show  
75 that modeling communities at this intermediate scale can accurately quantify metabolic processes  
76 from population dynamics data alone. We demonstrate the value of this approach on three  
77 engineered communities of *Escherichia coli* (*E. coli*) strains with increasing levels of complexity:  
78 (1) unilateral acetate-mediated cross-feeding<sup>16</sup>, (2) bilateral amino-acid-mediated cross-feeding  
79 between leucine and lysine auxotrophs<sup>17</sup>, and (3) multilateral amino-acid-mediated cross-feeding  
80 between 14 distinct amino acid autotrophs<sup>18</sup>. The models report inferred leakage fractions of  
81 metabolic byproducts that are difficult to measure directly by experiments, reveal how resource  
82 supply and partitioning alter the coexistence and ecological relationships between cross-feeders,  
83 and predict the limits of community robustness against external perturbations.

84

## 85 **Results**

86 **Modeling microbial metabolic processes at an intermediate level is appropriate to fit the**  
87 **population dynamics data.** Inspired by the classical MacArthur's CR models<sup>19</sup> and many follow-  
88 ups<sup>13,20–22</sup>, we propose to integrate CR models with a coarse-grained yet mechanistic description  
89 of cell metabolism. Metabolic reactions can be broadly classified as catabolic and anabolic, where

90 catabolic reactions break down complex substrates from culture media into smaller metabolic  
91 intermediates that can be used to build up biomass components by anabolic reactions. A minimal  
92 representation of cell metabolism is a three-layer network composed of growth substrates at the  
93 top, metabolic intermediates in the middle, and biomass at the bottom (Fig. 1). Despite its  
94 simplicity, this model is flexible enough to describe the transformation of resources into other  
95 resources or non-consumable chemicals and biomass, regardless of the specific reactions involved.  
96 Real cells can consume multiple nutritional resources that may be either substitutable or  
97 complementary for cell growth. Our model focuses on complementary resources for three reasons:  
98 (1) many microorganisms in natural samples are auxotrophs<sup>23</sup> whose growth relies on  
99 complementary essential nutrients; (2) minimal medium—popular for cultivating microbial  
100 communities in laboratory conditions including the data analyzed in our study—is composed of  
101 complementary nutrients; (3) substitutable metabolites can be mathematically lumped into  
102 functional groups.

103         Based on these assumptions, we developed a dynamic modeling framework that contains  
104 six kinds of biochemical reactions describing resource consumption, transformation, secretion,  
105 utilization for biomass synthesis, and inactivation (Supplementary Equations (S1)-(S6)). Briefly,  
106 substrates available in the growth media can be imported into cells. A certain fraction of the  
107 imported substrates is then broken down into metabolites, which can either be released back to the  
108 surrounding environment or used by cells for biomass production. Released metabolites can be  
109 imported by cells in a way similar to externally supplied substrates, except that their uptake may  
110 be inhibited by other substitutable substrates that are assumed to be preferentially used. To model  
111 the effects of toxic compounds<sup>24</sup> we allow the growth rate of any cell population to be not only  
112 governed by a birth-death process that constantly produces and loses cell material due to

113 biosynthetic and maintenance processes respectively, but can be additionally inhibited by  
 114 accumulation of toxic metabolites in the environment.

115 The six types of reactions can be translated to differential equations by specifying their  
 116 kinetic rate expressions. We assumed quasi-steady-state for intracellular substrates and  
 117 metabolites, as metabolic reactions typically occur at faster time scales compared to ecological  
 118 dynamics. The time-scale separation thus simplifies our model by excluding intracellular variables,  
 119 leaving only three types of variables that describe the population density of active cells ( $N_l$ ,  $l =$   
 120  $1, 2, \dots, n_c$ ), the extracellular concentrations of substrates ( $[S_i]$ ,  $i = 1, 2, \dots, n_s$ ), and the  
 121 concentrations of metabolic byproducts excreted by cells ( $[M_j]$ ,  $j = 1, 2, \dots, n_m$ ). Assuming a  
 122 chemostat environment with dilution rate  $D$  (which reduces to a batch culture when  $D = 0$ ), the  
 123 differential equations associated with the three state variables are given below

$$\frac{d[S_i]}{dt} = D(S_{0,i} - [S_i]) - \sum_{l=1}^{n_c} J_{l,i}^{upt,S} N_l \quad (1)$$

$$\frac{dN_l}{dt} = N_l(J_l^{grow} - J_l^{death} - D) \quad (2)$$

$$\frac{d[M_j]}{dt} = D(M_{0,j} - [M_j]) + \sum_{l=1}^{n_c} (J_{l,j}^{leak,M} - J_{l,j}^{upt,M}) N_l \quad (3)$$

124 where  $S_{0,i}$  and  $M_{0,j}$  are the feed medium concentrations of substrate  $S_i$  and metabolite  $M_j$   
 125 respectively.  $J_{l,i}^{upt,S}$  and  $J_{l,j}^{upt,M}$  represent uptake fluxes of substrates and metabolites respectively,  
 126  $J_{l,j}^{leak,M}$  are metabolite secretion fluxes, and  $J_l^{grow}$  and  $J_l^{death}$  stand for per-capita growth and death  
 127 rates respectively. We used Monod kinetics and first-order kinetics for resource uptake ( $J_{l,i}^{upt,S}$  and  
 128  $J_{l,j}^{upt,M}$ ) and cell death ( $J_l^{death}$ ) respectively, and obtained expressions for resource transformation  
 129 into other resources ( $J_{l,j}^{leak,M}$ ) and biomass ( $J_l^{grow}$ ) by intracellular flux balance analysis. The

130 functional forms of these kinetic laws and other details of model formulation are described in  
131 Supplementary Texts 1.1.

132 Experimental data can be used to determine the parameters of our model either manually  
133 (by visual inspection) or automatically (by optimization algorithms). In the examples below we  
134 applied a combination of automatic and manual calibrations, where the latter is arguably a  
135 subjective process and requires an experienced operator with prior knowledge to choose a set of  
136 parameter values that are physically and biologically realistic through a laborious trial-and-error  
137 process. For each application, the manual process of parameter estimation began with initial values  
138 of parameters selected to be either equal to their previously reported values or assumed to be of  
139 the same order of magnitude based on the literature data. This was followed by the iterative  
140 evaluation of model outputs and refinement until sufficient concordance between the model  
141 predictions and the experimental data is achieved.

142

143 **Fitting the model to microbial community data.** We applied our framework to published  
144 datasets of two two-species communities with increasing level of complexity: a uni-lateral<sup>16</sup> and a  
145 bi-lateral<sup>17</sup> cross-feeding between laboratory evolved and engineered strains of *E. coli* respectively.  
146 Our goal was to manually parameterize the intrinsic metabolic processes relevant for the  
147 interactions between the community members, directly from time series data of community  
148 composition and experimentally measured metabolite concentrations. The number of metabolites  
149 essential for *E. coli* growth is estimated of the order of hundreds<sup>25</sup>. Therefore, we chose to include  
150 in our model as model variables only the metabolites known to mediate interpopulation  
151 interactions, together with the most limiting growth substrate.



152           The first community is a well-documented unilateral acetate-mediated cross-feeding  
153 polymorphism evolved from a single ancestral lineage of *E. coli* in laboratory conditions<sup>16</sup> (Fig.  
154 2A, Supplementary Texts 1.2.1, and Supplementary Table 1). The community contains two  
155 polymorphic subpopulations (*E. coli* subspecies) whose metabolism differs in their quantitative  
156 ability to uptake and efflux carbon sources: a glucose specialist strain (CV103) which has a faster  
157 glucose uptake rate but cannot grow on acetate, and an acetate specialist strain (CV101) which can  
158 grow on acetate but has a lower glucose uptake rate. CV103 secretes acetate—a major by-product  
159 of its aerobic metabolism—and this way creates a new ecological niche for CV101. Fig. 2B-E  
160 shows that our model accurately reproduced the observed changes in growth and acetate  
161 concentration in both monoculture and coculture experiments over time. Particularly, we captured  
162 that the competition outcome depends on the acetate level in the feed medium (Fig. 2E), which  
163 can be explained by the positive nutritional effect of the acetate at low concentrations  
164 (Supplementary Fig. 1).

165           The second community is characterized by a synthetic cross-feeding mutualism between  
166 lysine and leucine auxotrophs of *E. coli*<sup>17</sup> (Fig. 2F, Supplementary Texts 1.3.1, and Supplementary  
167 Table 2). The two mutants differ only by single gene deletions in the lysine ( $\Delta lysA$ ) and leucine  
168 ( $\Delta leuA$ ) biosynthesis pathways. Neither mutant can grow in monoculture, but their coculture can  
169 survive by creating a bilateral dependency of two mutants cross-feeding each other missing  
170 essential amino acids. Fig. 2G, H show that our model was able to quantitatively recapitulate the  
171 growth and nutrient dynamics in both monoculture and coculture conditions. The fitted values of  
172 parameters reveal that the maximum growth rate of the lysine auxotroph is over 50% larger than  
173 that of the leucine auxotroph (Fig. 2I), which is consistent with the data showing that the  
174 biosynthesis of leucine is more costly than the biosynthesis of lysine<sup>18</sup>. Nonetheless, the parameters

175 also indicate that the mortality rate of the lysine auxotroph (about 20% of its maximum growth  
176 rate) is also substantially higher than that of the leucine auxotroph (Fig. 2J), which qualitatively  
177 agrees with cell viability experiments in the monoculture and absence of amino acid  
178 supplementation<sup>17</sup>. Since cell mortality rate is determined by the ratio of maintenance rate to  
179 nutrient recycling efficiency from dead cells<sup>26</sup>, this finding suggests that the lysine auxotroph has  
180 either or both of high maintenance cost and low biomass recovering yield.

181 Comparison of these two cross-feeding models suggests that resource sharing between  
182 natural (CV103 and CV101) and engineered ( $\Delta lysA$  and  $\Delta leuA$ ) cross-feeders can be markedly  
183 different. We predicted that the glucose specialist lost 33% carbon in acetate overflow resulting in  
184 nearly equal flux values between acetate secretion and glucose uptake, a quantitative relationship  
185 that has been observed in a different *E. coli* strain<sup>27</sup>. By contrast, the engineered interaction  
186 between the  $\Delta lysA$  and  $\Delta leuA$  is much weaker with only 0.3% and 1.4% carbon loss in releasing  
187 leucine and lysine respectively. Although the acetate-mediated cross-feeding may have been an  
188 incidental finding, the high efflux of acetate could facilitate adaptive co-evolution and  
189 accumulation of degenerative mutations<sup>16</sup>.

190

191 **Metabolic secretion fluxes modulate likelihood of genotypic coexistence.** The stable  
192 coexistence of different genotypes is a prerequisite for mixed microbial communities. But how  
193 strong are the metabolic secretion fluxes necessary to maintain genotypic coexistence in the  
194 absence of metabolite supplementation? We leveraged the two cross-feeding models above to  
195 address this question by simulating cocultures in chemostats at varied levels of resource supply  
196 and partitioning, which independently and synergistically modulate the actual secretion flux values.

197 We constructed phase diagrams that show how the community composition at steady state  
198 has distinct patterns between the two cross-feeding systems (Fig. 3A,B). First, competitive  
199 exclusion does not occur when cross-feeding is obligate and bidirectional (Fig. 3B). Second,  
200 coexistence of the glucose and acetate specialists can be attained largely independent of glucose  
201 supply when the partitioning level, controlled by the acetate leakage fraction  $\varphi_a$ , is below a certain  
202 threshold (dashed yellow line in Fig. 3A). By solving the model analytically (Supplementary Texts  
203 1.2.2), we found that the threshold can be approximated by  $\Delta V_g = (V_{3,g} - V_{1,g})/V_{3,g}$ , where  $V_{3,g}$   
204 and  $V_{1,g}$  are the maximum glucose uptake rates of the glucose and acetate specialists respectively.  
205 When  $\varphi_a > \Delta V_g$ , the glucose specialist releases more acetate than the amount needed to help the  
206 acetate specialist overcome its basal growth disadvantage, causing a declining self-balancing  
207 capacity of population dynamics and reduced likelihood of coexistence. By contrast, coexistence  
208 of the lysine and leucine auxotrophs is only weakly constrained by the resource partitioning level,  
209 but ultimately determined by the total amount of resources put into the system (Supplementary  
210 Texts 1.3.2).

211 Within the region of coexistence, the relative frequency of the acetate specialist increases  
212 continuously with the fraction of acetate leaked (Fig. 3A), whereas increasing the fraction of lysine  
213 leaked by the leucine auxotroph triggers a discontinuous, abrupt switch from a steady state  
214 dominated by the leucine auxotroph to a steady state dominated by the lysine auxotroph (Fig. 3B).  
215 Such abrupt, discontinuous regime shifts are a common feature of microbial communities limited  
216 by several essential nutrients<sup>28</sup>. Interestingly, growth of the dominant and rare auxotrophs are  
217 always limited by its auxotrophic amino acid and glucose respectively, which suggests an implicit  
218 negative feedback loop that maintains their relative abundance ratio before and after the switch:  
219 increasing population size of the dominant auxotroph impairs the growth of the rare auxotroph by

220 consuming more glucose but eventually, its own growth is inhibited because a smaller amount of  
221 amino acid it needs to grow can be produced by its partner. Taken together, our models show that  
222 the likelihood of coexistence can be modulated by varying the metabolic secretion fluxes, but the  
223 effect of varying those fluxes depends on the approach used to modulate the system (resource  
224 supply or partitioning) and the cross-feeding type (unilateral or bilateral).

225

### 226 **Environmental changes to nutrients can reverse the sign of microbial social interactions.**

227 Cross-feeding interactions within a microbial community may be described as social interactions  
228 with costs and benefits to the members involved<sup>29,30</sup>. Those costs and benefits may be altered by  
229 environmental perturbations that supply or remove the cross-fed metabolites from the environment.  
230 Using our community model, we investigated how the supplementation of metabolite mediators  
231 affected ecological relationships between cross-feeders at the steady state. We simulated  
232 chemostat cocultures at increasing levels of metabolite supplementation in the feed medium, and  
233 computed the net effect (+,0,-) of one population on the other by comparing to monoculture  
234 simulation. The pairwise ecological relationship between the two populations can then be  
235 determined by the signs of their reciprocal impacts<sup>31</sup>.

236 The ecological relationship between the glucose and acetate specialists was displayed on a  
237 2-dimensional phase space spanned by the feed medium concentrations of glucose and acetate (Fig.  
238 4A). The entire space is divided into six distinct regions with diverse outcomes, including  
239 population collapse, competitive exclusion, and stable coexistence. Notably, it is very difficult to  
240 select supplementation resulting in stable coexistence. This is because, as explained above, the  
241 inferred value of  $\varphi_a$  (0.33) is much greater than that of  $\Delta V_g$  (0.12). The remaining diversity of the  
242 phase space structure is primarily driven by the dose-dependent effect of acetate<sup>24</sup>: it serves as a

243 nutrient for the acetate specialist at low concentration but becomes inhibitory to growth of both  
244 strains when abundant (Supplementary Fig. 1). To illustrate this effect, we increased glucose  
245 supplementation from  $P_1$  to  $P_3$  (gray dots in Fig. 4A) in the phase space, which induced higher  
246 release of acetate to environment (Fig. 4B, top row) and switch of winners of the coculture  
247 competition (Fig. 4B, middle row). The glucose specialist wins the competition at  $P_1$  because  
248 acetate level is too low to compensate the growth disadvantage of the acetate specialist. From  $P_1$   
249 to  $P_2$ , acetate concentration exceeds the threshold level of compensation and thus supports faster  
250 growth of the acetate specialist. Further increase of acetate concentration to  $P_3$  inhibits both strains,  
251 among which the acetate specialist is more susceptible (Fig. 4B, bottom row; see also Fig. 2D):  
252 therefore, the glucose specialist wins again when the negative inhibitory effect of acetate  
253 outweighs its positive nutritional effect on the acetate specialist.

254       Compared to unilateral cross-feeding, new ecological relationships such as mutualism and  
255 parasitism emerges in the phase space when cross-feeding is bidirectional (Fig. 4C). The  
256 mutualistic relationship was maintained over a broad range of supplied amino acid concentrations,  
257 even though amino acid supplementation releases the dependence of one auxotroph on the other  
258 and is hence detrimental to mutualism. In the regime of mutualism, glucose is in excess and both  
259 strains are limited by the essential amino acids they cannot produce (Fig. 4D, left column). Further  
260 addition of amino acids leads to strain dominance, but not necessarily competitive exclusion. The  
261 lysine auxotroph was excluded when leucine was provided to release the leucine auxotroph from its  
262 growth dependence (Fig. 4D, middle column), whereas adding lysine only reduced the relative  
263 abundance of the leucine auxotroph, rather than leading to the loss of its entire population (Fig.  
264 4D, right column).

265 Amino acid supplementation may lead to competitive exclusion or parasitism depending  
266 on whether one or both auxotrophs are limited by glucose. When glucose limits both auxotrophs,  
267 the leucine auxotroph wins because it has the same growth rate as the lysine auxotroph on glucose  
268 but lower death rate (Fig. 2I,J). When only the lysine auxotroph is limited by glucose, the leucine  
269 auxotroph can sustain its population by occupying a different niche and growing on leucine  
270 released by its competitor. Regardless of the outcome, our results suggest that adding cross-fed  
271 nutrients can induce competition between community members that previously interacted  
272 mutualistically, and shift positive interactions to negative interactions.

273

274 **Uncovering complex cross-feeding interactions between 14 amino acid auxotrophs.** Next we  
275 demonstrated the utility of our model to study cross-feeding interactions within communities of  
276 more than two members. We modeled a community of 14 amino acid auxotrophs engineered from  
277 *E. coli* by genetic knockout<sup>18</sup>. The 14-auxotroph model was directly extended from our 2-  
278 auxotroph model (Supplementary Texts 1.4.1) by considering each auxotroph can potentially  
279 release all other 13 amino acids to the shared environment. Although all feeding possibilities are  
280 known, the consumer feeding preferences are not. By fitting experimental data on the population  
281 compositions we aimed to infer the unknown feeding pattern—what amino acids and how much  
282 they are released by each auxotrophic strain to feed each other.

283 The model constructed this way has a total of 269 parameters; 50 of these parameters are  
284 either biological constants or can be obtained from the literature (Supplementary Table 3). From  
285 the remaining parameters, the 196 unknown amino acid leakage fractions (14 auxotroph by 14  
286 amino acids) can be easily estimated by automatically minimizing the least square error between  
287 observed fold changes of population density in all pairwise batch cocultures (196 data points in

288 total) and their analytical, rather than simulated, solutions after model simplification  
289 (Supplementary Texts 1.4.2).

290 Outcompeting a simple population dynamics model (Fig. 5A, Pearson's correlation  
291 coefficient = -36.06%), our fit gave an excellent match to the data (Fig. 5B, Pearson's correlation  
292 coefficient = 94.32%), except for cross-feeding pairs whose observed fold change values are less  
293 than 1. The observed reduction of growth fold changes may be caused by cell death in the absence  
294 of nutrients but practically, we assumed no cell death (so simulated growth fold changes are always  
295 non-decreasing) because measurement of optical density at low inoculation amount ( $10^7$  cells/mL)  
296 is highly noisy and we are unable to distinguish between the two factors. Clearly, the 14 auxotrophs  
297 derived from the same wild-type strain showed different profiles of amino acid leakage (Fig. 5C):  
298 some auxotrophs such as the methionine auxotroph  $\Delta M$  (36.41% total carbon loss) are highly  
299 cooperative whereas others such as the tryptophan auxotroph  $\Delta W$  (1.37% total carbon loss) have  
300 very low cooperativity.

301 The remaining 20 free parameters, among which 14 are death rate constants, were obtained  
302 by manually selecting a set of values that fit the population dynamics of serially diluted cocultures  
303 of all 14 auxotrophs and four selected 13-auxotroph combinations (Fig. 5D). The fit is reasonably  
304 good at the log scale, except for the  $\Delta M$ -absent community which seems to undergo non-ecological  
305 processes that rescue the threonine auxotroph ( $\Delta T$ ) from the brink of extinction between day 2 and  
306 day 3. Quantitatively, the Pearson's correlation coefficients between log<sub>10</sub>-transformed observed  
307 and predicted values are 88.71% (all 14 auxotrophs), 75.30% ( $\Delta K$ -absent), 78.34% ( $\Delta R$ -absent),  
308 52.93% ( $\Delta T$ -absent), and 8.90% ( $\Delta M$ -absent). Most auxotrophs were diluted away very quickly  
309 but some exhibited transient recovery dynamics after the initial decay. For example, population  
310 density of the isoleucine ( $\Delta I$ ) auxotroph had an initial drop because the isoleucine pool had not

311 been accumulated to a critical size that allows the actual growth to compensate for mortality and  
312 dilution. As the pool size increases, its net growth rate (growth minus mortality) surpasses the  
313 dilution rate and recovers its population density, which eventually levels off when the positive and  
314 negative forces reach equilibrium. By fitting the population density dynamics, we concomitantly  
315 inferred the concentration dynamics of glucose and all amino acids (Supplementary Fig. 3), which  
316 are hidden states (not yet observed) that are relatively costly and inaccurate to measure in  
317 experiments.

318

319 **Cross-feeding network is prone to collapse upon external perturbations.** By simulating the  
320 14-auxotroph community model to steady state, we predicted that the initial mixture converges to  
321 a stable coexisting subset that contains 4 auxotrophs that are deficient in biosynthesis of isoleucine  
322 ( $\Delta I$ ), lysine ( $\Delta K$ ), methionine ( $\Delta M$ ), and threonine ( $\Delta T$ ) (Fig. 6A). The predicted coexistence state  
323 was successfully validated by two independent observations over 50-day serial dilution<sup>18</sup>, a much  
324 longer period of time than the duration of the training dataset (7-day serial dilution; Fig. 5D). The  
325 predicted resource-consumer relationships of the stable subset are shown in a bipartite network  
326 (Fig. 6B), where 3 amino acid secretion fluxes were identified as essential (solid arrows) as their  
327 deletions resulted in strain loss (Supplementary Fig. 4). These essential fluxes suggest that the  
328 primary feeders for  $\Delta K$ ,  $\Delta M$ ,  $\Delta T$  are  $\Delta T$ ,  $\Delta I$ ,  $\Delta M$  respectively; however, none of  $\Delta K$ ,  $\Delta M$ ,  $\Delta T$   
329 dominates the feeding of  $\Delta I$  and their contributions to the isoleucine pool in the environment are  
330 substitutable.

331 We computationally tested how external perturbations, including nutrient downshift, the  
332 addition of antibiotics, and invasion of cheating phenotypes (the same auxotrophic dependence but  
333 no amino acid leakage) affect the stability of coexistence among the 4 auxotrophs (see Methods).



334 The 4-strain community was able to cope with these disturbances to a certain extent and remained  
335 integrated. Beyond the thresholds, all three perturbation types resulted in community collapse as a  
336 result of domino effect (Fig. 6C-E), implying that tightly coupled cooperative communities are  
337 fragile and prone to collapse. Since antibiotics inhibit growth of individual strains (targeting  
338 consumer nodes in the bipartite network) while cheaters are amino acid sinks (targeting resource  
339 nodes in the bipartite network), we identified that  $\Delta T$  and methionine as the weakest consumer  
340 node (Fig. 6D) and resource node (Fig. 6E) in the bipartite network respectively. Our results  
341 suggest that  $\Delta T \rightarrow K$  (secretion of lysine by the threonine auxotroph) and  $M \rightarrow \Delta M$  (uptake of  
342 methionine by the methionine auxotroph)—the outgoing links from the two weakest nodes that  
343 are also essential to maintain community integrity—are the weakest metabolic fluxes that may set  
344 the resistance level of the community to external perturbations<sup>32</sup>.

345

## 346 **Discussion**

347 Predicting population dynamics from the interactions between its members is difficult  
348 because interactions can happen across multiple scales of biological organization<sup>33</sup>. Here we  
349 propose a coarse-grained yet mechanistic ecology model and show that it may accurately quantify  
350 the metabolic exchanges underlying cross-feeding interactions in well-defined laboratory  
351 communities. Previous studies have used the metabolic flux analysis, but these studies required  
352 flux measurements by isotope tracing and metabolomics to fit the adjustable flux parameters in a  
353 stoichiometric metabolic model. Some success was also achieved by fitting the time series data  
354 with simple ecological models<sup>34–38</sup> such as the gLV equations; however, in gLV-type models,  
355 interspecific interactions are phenomenologically defined based on density dependency, which  
356 gives no mechanistic understanding of how interactions occur<sup>39</sup>. By contrast, our model has

357 explicit formulations of context dependency by representing the chemical flows within and  
358 between microbes and thus can explain the metabolic part of microbe-microbe interactions.

359         When we have limited prior knowledge and data on a given community it becomes critical  
360 to choose the right level of details. We show that a highly detailed metabolic network is not  
361 necessary for developing useful ecological models. In single-bacteria studies, coarse-grained  
362 metabolic models have been employed to understand the design principles of metabolic networks  
363 and their regulation<sup>40</sup>, as well as to predict metabolic flux distributions useful for synthetic  
364 biology<sup>41</sup> and industrial<sup>42</sup> applications. Compared to genome-scale models, using coarse-grained  
365 models linking ecology and metabolism is simple but rarely done until recently<sup>22</sup>. Depending on  
366 the research question, a coarse-grained metabolic network can be created at any level of granularity  
367 from a single reaction to the complete genome-scale reconstruction. The choice of granularity and  
368 how to derive a simpler model from the more complex one are usually empirical but can be  
369 facilitated by more systematic approaches to reduce dimensionality.

370         Our model could extract new insights from previously published empirical data. The  
371 analysis shows that unidirectional cross-feeding is equivalent to a commensalism and bidirectional  
372 cross-feeding is equivalent to a mutualism. As shown by our study (Fig. 4) and previous work<sup>24,29</sup>,  
373 the actual relationship between cross-feeders, however, can be diverse in even simple and constant  
374 environments (e.g., glucose minimal medium) due to a combination of positive effects of cross-  
375 feeding with negative effects of competition and toxicity of cross-fed metabolites, suggesting that  
376 the exact outcome cannot be precisely delineated by the cross-feeding type alone. Moreover,  
377 mechanistic models can help identify knowledge gaps<sup>43</sup>. For example, recent experiments have  
378 demonstrated that the coexistence of two carbon source specialists in the unilateral cross-feeding  
379 example is mutualistic in the sense that the consortium is fitter than the individuals<sup>44</sup>. The syntropy

380 can be explained by a null expectation from theoretical ecology models<sup>45</sup>: the glucose specialist  
381 provides acetate in an exchange for a service provided by the acetate specialist which scavenges  
382 the acetate down to a level at which growth inhibition is insignificant. Although we thoroughly  
383 considered the mechanism of resource-service exchange, additional features of our model and/or  
384 the use of data-consistent parameter values did not support mutualistic coexistence in any  
385 environmental condition we tested (however, competitive coexistence is possible). The  
386 discrepancy suggests that our model and even the classical resource-service exchange theory have  
387 missed some qualitative or quantitative details that are the key to understanding of syntrophic  
388 mechanisms in this specific example.

389         What could we have missed? Since mutualism occurs when the reciprocal benefits  
390 associated with cross-feeding outweigh competitive costs<sup>46</sup>, our model should logically predict  
391 either or both of lower benefits and higher costs than the null expectation from simpler models. In  
392 the classical theory of syntropy, it is typically assumed that leaking chemicals are by-products  
393 which are inhibitory to producers but beneficial to consumers<sup>45</sup>. Since acetate was shown to inhibit  
394 growth of both cell types (Fig. 2D) and acetate specialist (the consumer) is more sensitive, its  
395 population density may be insufficient to reward the glucose specialist to a level that allows  
396 benefits higher than costs. On the other hand, costs are potentially similarly high since both cell  
397 types are polymorphic and share similar glucose uptake kinetics. We estimated that the relative  
398 difference in their maximum growth rates is 12%, which is much smaller than the observed value  
399 in experiments (33%)<sup>16</sup>. This quantitative difference may be important considering that the  
400 competition is stronger between populations with similar nutrient acquisition strategies. Recently,  
401 it was theoretically proposed that controlled metabolic leakages optimize resource allocation and  
402 can be beneficial to producers even under nutrient limitation<sup>47</sup>. We speculate that in case where

403 acetate overflow improves, rather than negatively impacts, the growth of producers, the likelihood  
404 of forming a mutualistic pair between two cell types would be much higher. Overall, the cost-  
405 benefit nature of the cross-feeding interaction between polymorphic *E. coli* strains is more  
406 complex than thought before and warrants further research.

407         So far, the current framework has been applied to well-characterized communities with  
408 known chemicals and associated interactions. Can it be applied to infer community structure of  
409 complex microbiomes (e.g., human gut microbiome) where most of the metabolic exchanges  
410 involved in microbe-microbe interactions are still unknown? Our model has the potential if some  
411 technical challenges can be solved. First, direct modeling of a real-world microbiome with  
412 hundreds of species would be hurdled by too many unknown kinetic parameters. One way to solve  
413 this problem is to simply ignore the rare species<sup>35</sup>. Another—arguably better—approach might be  
414 by grouping species composition into functional guilds using unsupervised methods that infer  
415 those groups from the data alone<sup>48</sup>, or to use prior knowledge from genomics or taxonomy to create  
416 such functional groups. Second, inferring chemical mediators within a community of interacting  
417 populations is a nontrivial task. It can be facilitated by prior knowledge such as searching the  
418 literature or leveraging systems biology tools such as community-level metabolic network  
419 reconstruction<sup>49</sup>. Finally, our model is nonlinear, so that an efficient and robust nonlinear  
420 regression approach for parameter estimation is essential. Manual parameter selection is often the  
421 only possible approach for small datasets like the experimental systems we analyzed here. Indeed,  
422 non-linear optimization algorithms often fail to converge to a realistic set of parameters. Although  
423 we chose the manual method to calibrate our models in this proof-of-concept study, manual fitting  
424 requires an expert operator and is a time-consuming process, which for now precludes it from  
425 being applied to large-scale microbial communities. On the positive side, the process of trial-and-

426 error was greatly improved by the speed at which the intermediate-scale model runs simulations  
427 on a regular desktop computer. Beyond these technical issues, the model itself can be extended in  
428 multiple ways such as incorporating mechanisms of resource allocation and non-metabolite-  
429 mediated interactions and, despite any present limitations, we anticipate that network inference  
430 using mechanism-explicit models can open new avenues for microbiome research towards more  
431 quantitative, mechanistic, and predictive science.

432

## 433 **Methods**

434 **General.** The modelling framework was developed by integrating a classical ecology model for  
435 population and nutrient dynamics and a coarse-grained description of cell metabolism. Custom  
436 MATLAB (The MathWorks, Inc., Natick, MA, USA) codes were developed to perform  
437 computational simulations and analyses of all three cross-feeding communities. Parameter values  
438 were obtained from either literature or a combination of manual and automatic data fitting. See  
439 Supplementary Information for a detailed description of the general modeling framework, the  
440 specific models for each of the three communities, as well as their theoretical analyses.

441

442 **Simulation.** Deterministic trajectories and their steady states in batch and chemostat conditions  
443 were simulated by solving the differential equations from the beginning to the end. Simulations of  
444 serial dilution transfer were slightly different in the aspect that the equations were only integrated  
445 within each day. The initial condition at the beginning of a day was obtained by dividing all  
446 population densities and nutrient concentrations at the end of the previous day by the dilution  
447 factor and resetting the feed medium glucose concentration to its initial value at day 0.

448

449 **Network perturbation.** External perturbations were exerted upon the steady state of the 4-  
450 auxotroph community. Nutrient downshift was simulated by decreasing the feed medium  
451 concentration of glucose at time 0. The effects of antibiotics targeting amino acid auxotroph  $i$  was  
452 simulated by multiplying the growth rate of the auxotroph by an inhibitory term, i.e.,  $J_i^{grow} \rightarrow$   
453  $J_i^{grow} / (1 + [A]/K_i)$ , where  $[A]$  is the antibiotic concentration and  $K_i$  is the inhibition constant.  
454 We assumed antibiotic concentration remains constant and chose  $K_i = 1 \mu M$ . The cheaters of each  
455 amino acid auxotroph were simulated by turning off all amino acid leakages of the auxotroph.  
456 They were mixed with the resident community in varying ratios at the beginning of simulation.  
457 For all three perturbation types, the feed medium glucose concentration is 0.2 wt% in the  
458 unperturbed condition and serial dilution was run to steady state at 60 days.

459

## 460 **Acknowledgements**

461 We thank Dr. Michael Mee, Dr. Harris Wang, and Dr. Jennifer Reed for provision and clarification  
462 of their experimental data. We also thank Dr. Jinyuan Yan for proofreading early drafts. This work  
463 was supported by NIH grants U01 AI124275 and R01 AI137269-01 to J.B.X. The funders had no  
464 role in study design, data collection and analysis, decision to publish, or preparation of the  
465 manuscript.

466

## 467 **Data availability**

468 The simulation data that support the conclusions of this study are available from authors upon  
469 reasonable request.

## 470 **Code availability**

471 The source codes for simulations of the three cross-feeding communities are available from  
472 <https://github.com/liaochen1988/coarse-grained-ecology-models-for-microbial-community>.

## 473 **References**

- 474 1. Kent, A. D. & Triplett, E. W. Microbial communities and their interactions in soil and  
475 rhizosphere ecosystems. *Annu. Rev. Microbiol.* **56**, 211–236 (2002).
- 476 2. Cho, I. & Blaser, M. J. The human microbiome: at the interface of health and disease. *Nat.*  
477 *Rev. Genet.* **13**, 260–270 (2012).
- 478 3. Li, H. Microbiome, Metagenomics, and High-Dimensional Compositional Data Analysis.  
479 *Annu. Rev. Stat. Appl.* **2**, 73–94 (2015).
- 480 4. Shank, E. A. Considering the lives of microbes in microbial communities. *mSystems* **3**, (2018).
- 481 5. Schmidt, R., Ulanova, D., Wick, L. Y., Bode, H. B. & Garbeva, P. Microbe-driven chemical  
482 ecology: past, present and future. *ISME J.* **13**, 2656–2663 (2019).
- 483 6. Morris, J. J. Black Queen evolution: the role of leakiness in structuring microbial communities.  
484 *Trends Genet.* **31**, 475–482 (2015).
- 485 7. Hao, T. *et al.* The Genome-Scale Integrated Networks in Microorganisms. *Front. Microbiol.*  
486 **9**, 296 (2018).
- 487 8. Morris, B. E. L., Henneberger, R., Huber, H. & Moissl-Eichinger, C. Microbial syntropy:  
488 interaction for the common good. *FEMS Microbiol. Rev.* **37**, 384–406 (2013).
- 489 9. Hibbing, M. E., Fuqua, C., Parsek, M. R. & Peterson, S. B. Bacterial competition: surviving  
490 and thriving in the microbial jungle. *Nat. Rev. Microbiol.* **8**, 15–25 (2010).
- 491 10. Hanemaaijer, M. *et al.* Systems modeling approaches for microbial community studies: from  
492 metagenomics to inference of the community structure. *Front. Microbiol.* **6**, 213 (2015).
- 493 11. Zomorodi, A. R. & Segrè, D. Synthetic ecology of microbes: mathematical models and

- 494 applications. *J. Mol. Biol.* **428**, 837–861 (2016).
- 495 12. Coyte, K. Z., Schluter, J. & Foster, K. R. The ecology of the microbiome: Networks,  
496 competition, and stability. *Science* **350**, 663–666 (2015).
- 497 13. Niehaus, L. *et al.* Microbial coexistence through chemical-mediated interactions. *Nat.*  
498 *Commun.* **10**, 2052 (2019).
- 499 14. Mahadevan, R., Edwards, J. S. & Doyle, F. J. Dynamic flux balance analysis of diauxic growth  
500 in *Escherichia coli*. *Biophys. J.* **83**, 1331–1340 (2002).
- 501 15. Nadell, C. D., Foster, K. R. & Xavier, J. B. Emergence of spatial structure in cell groups and  
502 the evolution of cooperation. *PLoS Comput. Biol.* **6**, e1000716 (2010).
- 503 16. Rosenzweig, R. F., Sharp, R. R., Treves, D. S. & Adams, J. Microbial evolution in a simple  
504 unstructured environment: genetic differentiation in *Escherichia coli*. *Genetics* **137**, 903–917  
505 (1994).
- 506 17. Zhang, X. & Reed, J. L. Adaptive evolution of synthetic cooperating communities improves  
507 growth performance. *PLoS One* **9**, e108297 (2014).
- 508 18. Mee, M. T., Collins, J. J., Church, G. M. & Wang, H. H. Syntrophic exchange in synthetic  
509 microbial communities. *Proc. Natl. Acad. Sci. USA* **111**, E2149-56 (2014).
- 510 19. MacArthur, R. Species packing and competitive equilibrium for many species. *Theor Popul*  
511 *Biol* **1**, 1–11 (1970).
- 512 20. Marsland, R. *et al.* Available energy fluxes drive a transition in the diversity, stability, and  
513 functional structure of microbial communities. *PLoS Comput. Biol.* **15**, e1006793 (2019).
- 514 21. Tilman, D. Resource competition and community structure. *Monogr Popul Biol* **17**, 1–296  
515 (1982).
- 516 22. Brunner, J. D. & Chia, N. Metabolite-mediated modelling of microbial community dynamics



- 517 captures emergent behaviour more effectively than species-species modelling. *J. R. Soc.*  
518 *Interface* **16**, 20190423 (2019).
- 519 23. Zengler, K. & Zaramela, L. S. The social network of microorganisms - how auxotrophies  
520 shape complex communities. *Nat. Rev. Microbiol.* **16**, 383–390 (2018).
- 521 24. LaSarre, B., McCully, A. L., Lennon, J. T. & McKinlay, J. B. Microbial mutualism dynamics  
522 governed by dose-dependent toxicity of cross-fed nutrients. *ISME J.* **11**, 337–348 (2017).
- 523 25. Kim, P.-J. *et al.* Metabolite essentiality elucidates robustness of *Escherichia coli* metabolism.  
524 *Proc. Natl. Acad. Sci. USA* **104**, 13638–13642 (2007).
- 525 26. Schink, S. J., Biselli, E., Ammar, C. & Gerland, U. Death Rate of *E. coli* during Starvation Is  
526 Set by Maintenance Cost and Biomass Recycling. *Cell Syst.* **9**, 64–73.e3 (2019).
- 527 27. Enjalbert, B., Millard, P., Dinclaux, M., Portais, J.-C. & Létisse, F. Acetate fluxes in  
528 *Escherichia coli* are determined by the thermodynamic control of the Pta-AckA pathway. *Sci.*  
529 *Rep.* **7**, 42135 (2017).
- 530 28. Dubinkina, V., Fridman, Y., Pandey, P. P. & Maslov, S. Multistability and regime shifts in  
531 microbial communities explained by competition for essential nutrients. *Elife* **8**, (2019).
- 532 29. Hammarlund, S. P., Chacón, J. M. & Harcombe, W. R. A shared limiting resource leads to  
533 competitive exclusion in a cross-feeding system. *Environ. Microbiol.* **21**, 759–771 (2019).
- 534 30. Hoek, T. A. *et al.* Resource Availability Modulates the Cooperative and Competitive Nature  
535 of a Microbial Cross-Feeding Mutualism. *PLoS Biol.* **14**, e1002540 (2016).
- 536 31. Faust, K. & Raes, J. Microbial interactions: from networks to models. *Nat. Rev. Microbiol.*  
537 **10**, 538–550 (2012).
- 538 32. Adamowicz, E. M., Flynn, J., Hunter, R. C. & Harcombe, W. R. Cross-feeding modulates  
539 antibiotic tolerance in bacterial communities. *ISME J.* **12**, 2723–2735 (2018).

- 540 33. Widder, S. *et al.* Challenges in microbial ecology: building predictive understanding of  
541 community function and dynamics. *ISME J.* **10**, 2557–2568 (2016).
- 542 34. Bucci, V. *et al.* MDSINE: Microbial Dynamical Systems INference Engine for microbiome  
543 time-series analyses. *Genome Biol.* **17**, 121 (2016).
- 544 35. Stein, R. R. *et al.* Ecological modeling from time-series inference: insight into dynamics and  
545 stability of intestinal microbiota. *PLoS Comput. Biol.* **9**, e1003388 (2013).
- 546 36. Buffie, C. G. *et al.* Precision microbiome reconstitution restores bile acid mediated resistance  
547 to *Clostridium difficile*. *Nature* **517**, 205–208 (2015).
- 548 37. Venturelli, O. S. *et al.* Deciphering microbial interactions in synthetic human gut microbiome  
549 communities. *Mol. Syst. Biol.* **14**, e8157 (2018).
- 550 38. Goldford, J. E. *et al.* Emergent simplicity in microbial community assembly. *Science* **361**,  
551 469–474 (2018).
- 552 39. Momeni, B., Xie, L. & Shou, W. Lotka-Volterra pairwise modeling fails to capture diverse  
553 pairwise microbial interactions. *Elife* **6**, (2017).
- 554 40. Kraft, B. *et al.* Nitrogen cycling. The environmental controls that govern the end product of  
555 bacterial nitrate respiration. *Science* **345**, 676–679 (2014).
- 556 41. Liao, C., Blanchard, A. E. & Lu, T. An integrative circuit-host modelling framework for  
557 predicting synthetic gene network behaviours. *Nat. Microbiol.* **2**, 1658–1666 (2017).
- 558 42. Liao, C. *et al.* Integrated, systems metabolic picture of acetone-butanol-ethanol fermentation  
559 by *Clostridium acetobutylicum*. *Proc. Natl. Acad. Sci. USA* **112**, 8505–8510 (2015).
- 560 43. Hanemaaijer, M., Olivier, B. G., Röling, W. F. M., Bruggeman, F. J. & Teusink, B. Model-  
561 based quantification of metabolic interactions from dynamic microbial-community data. *PLoS*  
562 *One* **12**, e0173183 (2017).

- 563 44. Yang, D.-D. *et al.* Fitness and productivity increase with ecotypic diversity among *E. coli*  
564 evolved in a simple, constant environment. *BioRxiv* (2019). doi:10.1101/679969
- 565 45. Estrela, S., Trisos, C. H. & Brown, S. P. From metabolism to ecology: cross-feeding  
566 interactions shape the balance between polymicrobial conflict and mutualism. *Am. Nat.* **180**,  
567 566–576 (2012).
- 568 46. Wu, F. *et al.* A unifying framework for interpreting and predicting mutualistic systems. *Nat.*  
569 *Commun.* **10**, 242 (2019).
- 570 47. Yamagishi, J. F., Saito, N. & Kaneko, K. Cellular potlatch: the advantage of leakage of  
571 essential metabolites and resultant symbiosis of diverse species. *arXiv preprint*  
572 *arXiv:1811.10172* (2018).
- 573 48. Gibson, T. E. & Gerber, G. K. Robust and scalable models of microbiome dynamics. *arXiv*  
574 *preprint arXiv:1805.04591* (2018).
- 575 49. Levy, R. & Borenstein, E. Metabolic modeling of species interaction in the human  
576 microbiome elucidates community-level assembly rules. *Proc. Natl. Acad. Sci. USA* **110**,  
577 12804–12809 (2013).
- 578 50. Gudelj, I., Kinnersley, M., Rashkov, P., Schmidt, K. & Rosenzweig, F. Stability of Cross-  
579 Feeding Polymorphisms in Microbial Communities. *PLoS Comput. Biol.* **12**, e1005269 (2016).
- 580

581 **Figure Legends:**

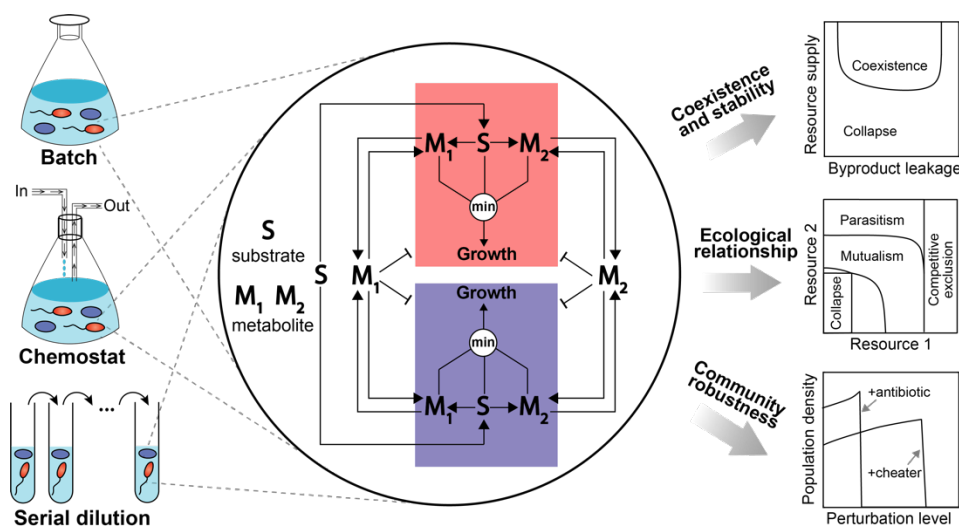

582

583 **Figure 1 | Schematic diagram illustrating our model and its potential applications in**

584 **microbial ecology research.** A distinguishing feature of our microbial community model is that

585 each community member harbors a coarse-grained metabolic network. Briefly, the metabolic

586 network transforms substrates (**S**) to byproduct metabolites (**M<sub>1</sub>**, **M<sub>2</sub>**) and then to biomass whose

587 production rate is set by the supply flux of the most limiting resource among all substrates and

588 metabolites. For simplicity, the network is visually illustrated using one substrate and two

589 metabolites but it can be extended to any number of molecules. Enabled by the simplified

590 metabolic network, different community members can interact through a variety of mechanisms,

591 including exploitative competitions for shared substrates, cooperative exchanges of nutritional

592 metabolites, and direct inhibition by secreting toxic metabolites. Using training data from batch,

593 chemostat or serial dilution cultures, our model can be parameterized to infer microbial processes

594 underlying the data and then used to explore ecological questions and generate testable predictions.

595 Pointed arrows denote the material flow and blunt-end arrows represent growth inhibition.

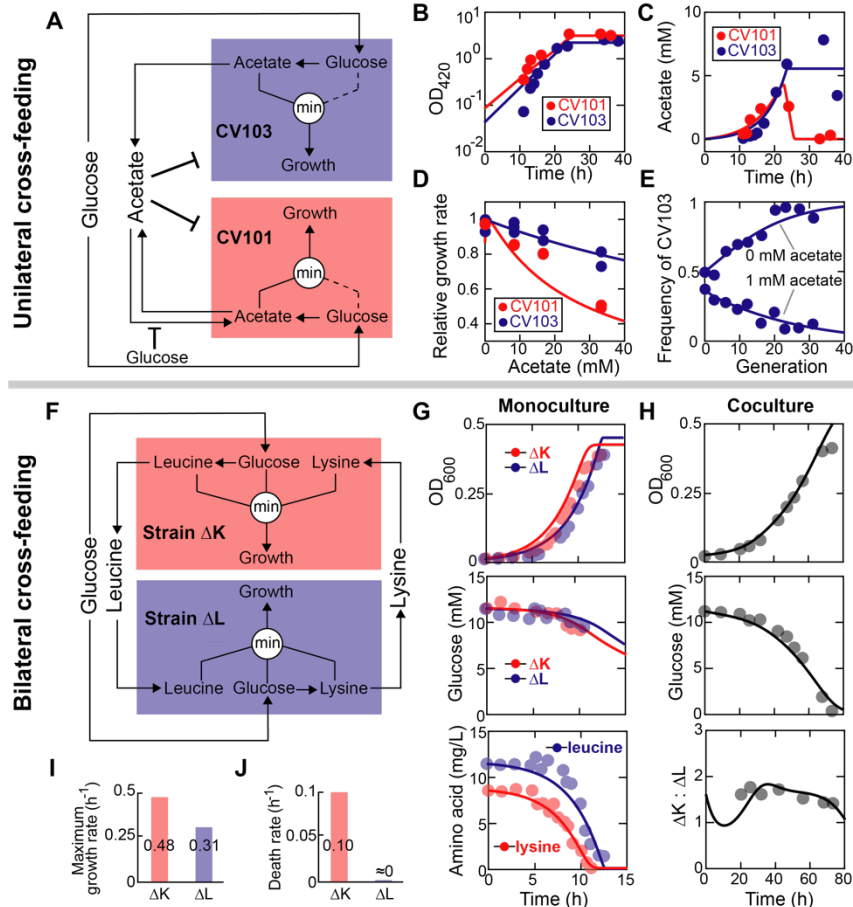

596

597 **Figure 2 | Model validation using two simple cross-feeding ecosystems.** (A-E) Unilateral

598 acetate-mediated cross-feeding. (A) Schematic diagram of the model. The glucose specialist

599 (CV103) and acetate specialist (CV101) are two *E. coli* mutants with different metabolic

600 strategies<sup>16</sup>: the glucose specialist has improved glucose uptake kinetics while the acetate specialist

601 is able to use acetate as an additional carbon source. At high concentrations the acetate inhibits the

602 growth of both strains and its uptake by the acetate specialist strain is weakly repressed by the

603 glucose. We assume that glucose and acetate are fully substitutable resources and simplify the

604 model by limiting bacterial growth dependence to acetate alone (indicated by dashed lines; see

605 experimental support of this hypothesis in Supplementary Texts 1.2.1). (B-E) Manual model

606 calibration. Circles: experimental data; lines: simulations. (B,C) 0.1% glucose-limited batch

607 monoculture without supplementing acetate<sup>16</sup>. (D) 0.0125% glucose-limited batch monoculture

608 supplemented with different concentrations of acetate<sup>50</sup>. (E) 0.00625% glucose-limited chemostat  
609 (dilution rate: 0.2 h<sup>-1</sup>) coculture with (1 mM) and without acetate supplementation<sup>16</sup>. (F-J) Bilateral  
610 amino-acid-mediated cross-feeding. (F) Schematic diagram of the model. The *E. coli* lysine  
611 auxotroph ( $\Delta K$ ) and leucine auxotroph ( $\Delta L$ ) compete for glucose while additionally acquiring  
612 essential amino acids from each other. Growth of each auxotroph is determined by the more  
613 limiting resource between glucose and the amino acid it needs to grow. (G,H) Manual model  
614 calibration. Circles: data; lines: simulation. (G) 2 g/L glucose-limited batch monoculture  
615 supplemented with 10 mg/L amino acids<sup>17</sup>. (H) 2 g/L glucose-limited batch coculture without  
616 amino acid supplementation. (I,J) Inferred maximum growth rate when all limiting nutrients are  
617 supplied in excess (I) and death rate (J) of  $\Delta K$  and  $\Delta L$  strains.

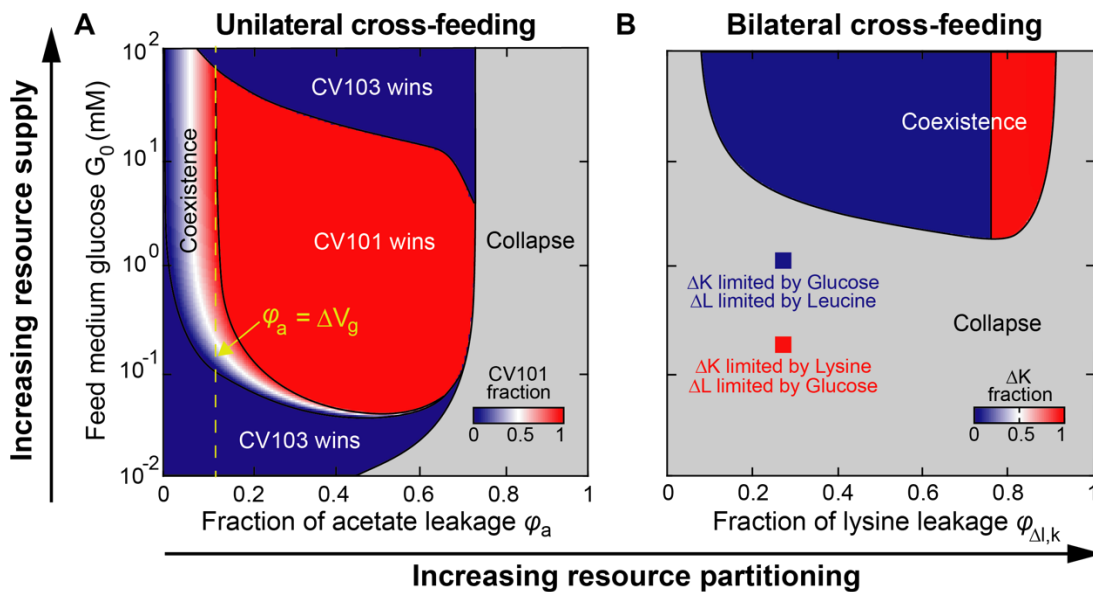

618  
 619 **Figure 3 | Impacts of resource supply and partitioning on coexistence of cross-feeders.** Steady  
 620 state compositions of the unilateral (A) and the bilateral (B) cross-feeding communities are shown  
 621 for varied levels of resource supply and partitioning. In (A),  $\Delta V_g$  represents the relative difference  
 622 in maximum glucose uptake rates between the glucose and acetate specialists, and gives the  
 623 theoretical threshold of acetate leakage fraction above which the region of coexistence shrinks  
 624 substantially. In (B), the leucine leakage fraction  $\phi_{\Delta k, l}$  was fixed at 0.5 and the lysine leakage  
 625 fraction  $\phi_{\Delta l, k}$  was varied. Supplementary Fig. 2 shows that the symmetric choice that fixes  $\phi_{\Delta l, k}$   
 626 and varies  $\phi_{\Delta k, l}$  does not change the pattern of coexistence. All chemostat simulations were run at  
 627 the dilution rate of  $0.1 \text{ h}^{-1}$ . CV103: glucose specialist; CV101: acetate specialist;  $\Delta K$ : lysine  
 628 auxotroph;  $\Delta L$ : leucine auxotroph.

629

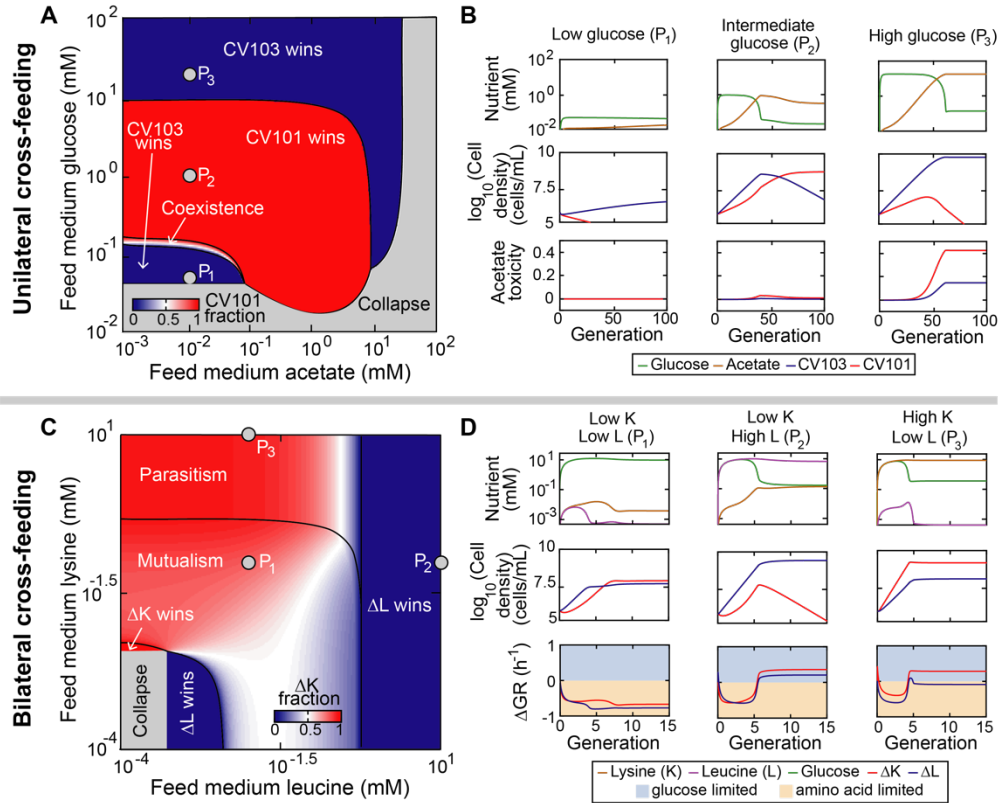

630

631 **Figure 4 | Impacts of nutrient supplementation on ecological relationships between cross-**

632 **feeders.** Steady state compositions (A,C) and representative system dynamic trajectories (B,D) of

633 the unilateral (A,B) and the bilateral (C,D) cross-feeding communities are shown for different

634 levels of nutrient supplementation. In (B), acetate toxicity was defined as the ratio of growth rates

635 between the presence and the absence of acetate. In (D),  $\Delta\text{GR}$  was defined as the growth rate

636 difference between amino-acid-limiting and glucose-limiting conditions. A positive or negative

637 value of  $\Delta\text{GR}$  indicates that cell growth is limited by glucose or amino acid respectively. The

638 dilution rates used to run chemostat simulations of the unilateral and bilateral cross-feeding

639 communities are 0.2 and 0.1  $\text{h}^{-1}$  respectively. CV103: glucose specialist; CV101: acetate specialist;

640  $\Delta\text{K}$ : lysine auxotroph;  $\Delta\text{L}$ : leucine auxotroph.

641



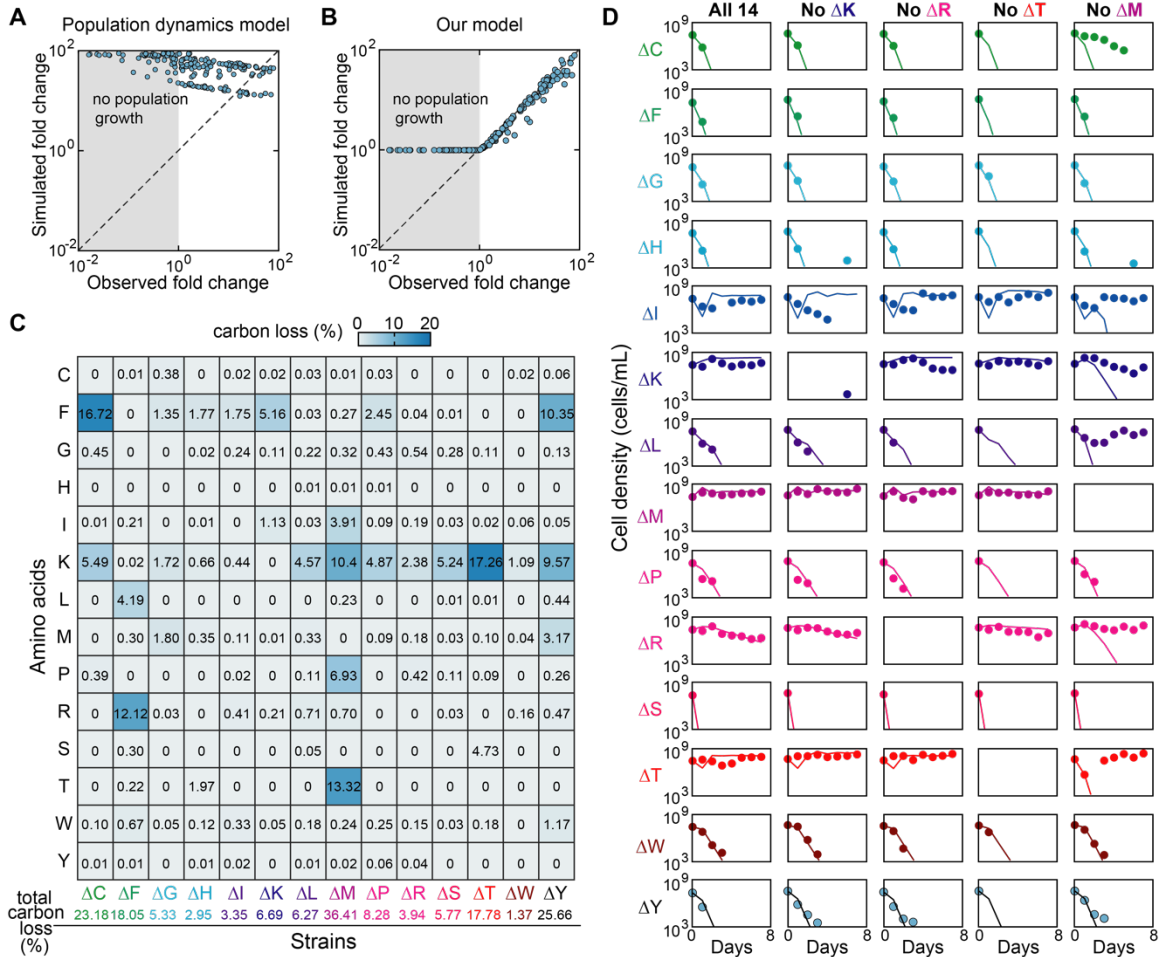

642

643 **Figure 5 | Modeling a consortium of 14 amino acid auxotrophs.** (A,B) Comparison of fold

644 changes in observed<sup>18</sup> and simulated cell densities in batch coculture of all possible pairwise

645 combinations of 14 *E. coli* amino acid auxotrophs. The population dynamics model and its

646 associated parameters were adopted from Mee *et al.*<sup>18</sup>. (C) Predicted amino acid leakage profiles

647 for the 14 auxotrophs. Each value in the matrix describes the fraction of carbon loss due to release

648 of the amino acid in the row by the auxotroph in the column. (D) Comparison of the observed<sup>18</sup>

649 (circles) and the simulated (lines) population dynamics in 7-day 100-fold serial dilution of one 14-

650 auxotroph and four 13-auxotroph communities. Abbreviations: cysteine auxotroph ( $\Delta C$ ),

651 phenylalanine auxotroph ( $\Delta F$ ), glycine auxotroph ( $\Delta G$ ), histidine auxotroph ( $\Delta H$ ), isoleucine

652 auxotroph ( $\Delta I$ ), lysine auxotroph ( $\Delta K$ ), leucine auxotroph ( $\Delta L$ ), methionine auxotroph ( $\Delta M$ ),

- 653 proline auxotroph ( $\Delta P$ ), arginine auxotroph ( $\Delta R$ ), serine auxotroph ( $\Delta S$ ), threonine auxotroph ( $\Delta T$ ),  
654 tryptophan auxotroph ( $\Delta W$ ), and tyrosine auxotroph ( $\Delta Y$ ).

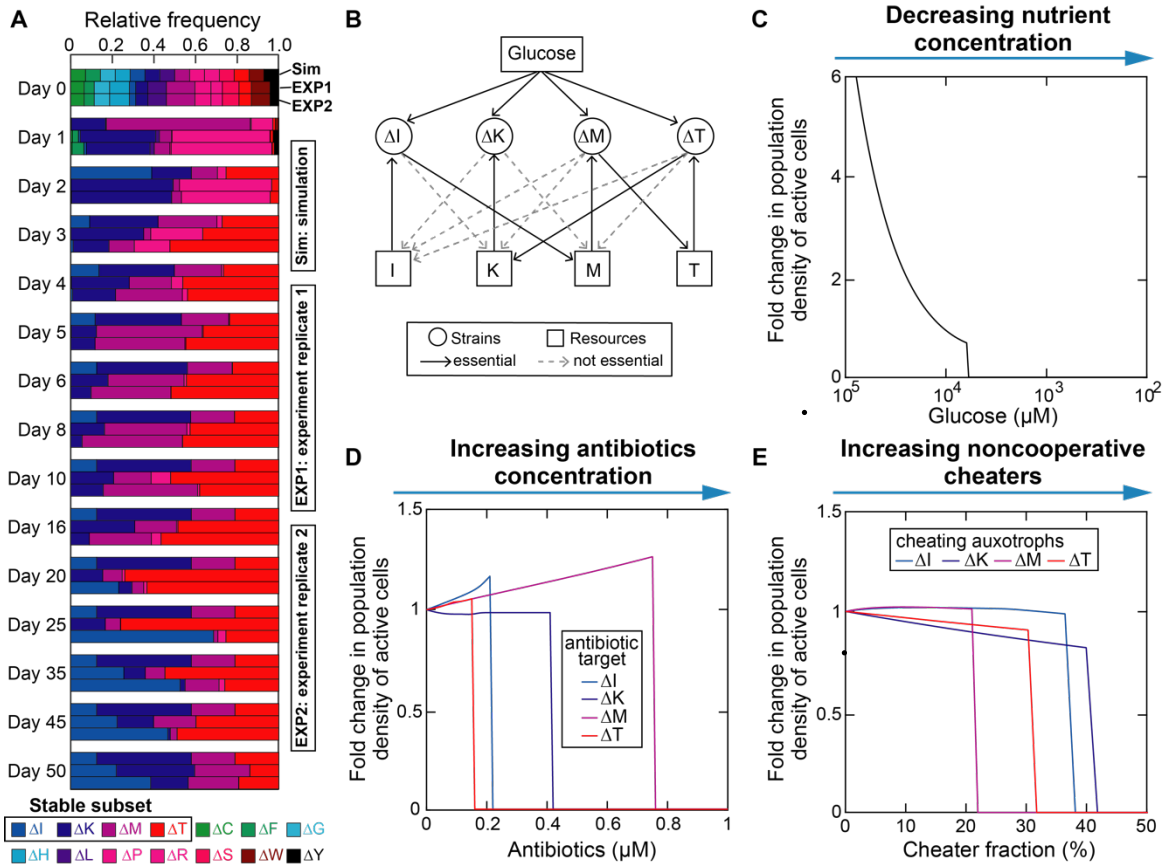

655

656 **Figure 6 | Collapse of mutualistic cross-feeding network following external perturbations. (A)**

657 Emergence of stable coexistence of a four-auxotroph subset ( $\Delta I$ ,  $\Delta K$ ,  $\Delta M$ ,  $\Delta T$ ) over 50 daily

658 passages. The two replicates of experimental observations were adopted from Mee *et al.*<sup>18</sup>. We

659 used the same simulation parameters as in Fig. 5D except for a longer simulation time. See Fig. 5

660 legend for abbreviations of the names of amino acid auxotrophs. (B) Predicted bipartite interaction

661 network of the subset. The network contains resource nodes (I, K, M, T for isoleucine, lysine,

662 methionine, and threonine respectively) and consumer nodes ( $\Delta I$ ,  $\Delta K$ ,  $\Delta M$ ,  $\Delta T$  are their

663 corresponding auxotrophs), and each directed link describes a resource-consumer relationship. (C-

664 E) External perturbations, including decreasing nutrient concentration (C), increasing antibiotic

665 concentration (D), and introducing noncooperative cheaters (E), result in an abrupt collapse of the

666 community when the perturbation level exceeds a certain threshold.
