1     **Modeling microbial cross-feeding at intermediate scale portrays community**  
2                                     **dynamics and species coexistence**

3                     Chen Liao<sup>1</sup>, Tong Wang<sup>2,3</sup>, Sergei Maslov<sup>3,4</sup>, Joao B. Xavier<sup>1,\*</sup>

4  
5     <sup>1</sup>Program for Computational and Systems Biology, Memorial Sloan-Kettering Cancer Center, New  
6     York, NY, United States of America, <sup>2</sup>Department of Physics, University of Illinois at Urbana-  
7     Champaign, IL 61801, USA, <sup>3</sup>Carl R. Woese Institute for Genomic Biology, University of Illinois  
8     at Urbana-Champaign, IL 61801, USA, <sup>4</sup>Department of Bioengineering, University of Illinois at  
9     Urbana-Champaign, IL 61801, USA

10

11     \*To whom correspondence may be addressed: J. Xavier (Email: [XavierJ@mskcc.org](mailto:XavierJ@mskcc.org))

12

13     Keywords:

14     cross-feeding; coarse-grained modeling; microbial community; ecological relationship; species  
15     coexistence; population dynamics

## 16 **Abstract**

17 Social interaction between microbes can be described at many levels of details: from the  
18 biochemistry of cell-cell interactions to the ecological dynamics of populations. Choosing an  
19 appropriate level to model microbial communities without losing generality remains a challenge.  
20 Here we show that modeling cross-feeding interactions at an intermediate level between genome-  
21 scale metabolic models of individual species and consumer-resource models of ecosystems is  
22 suitable to experimental data. We applied our modeling framework to three published examples of  
23 multi-strain *Escherichia coli* communities with increasing complexity: uni-, bi-, and multi-  
24 directional cross-feeding of either substitutable metabolic byproducts or essential nutrients. The  
25 intermediate-scale model accurately fit empirical data and quantified metabolic exchange rates that  
26 are hard to measure experimentally, even for a complex community of 14 amino acid auxotrophies.  
27 By studying the conditions of species coexistence, the ecological outcomes of cross-feeding  
28 interactions, and each community's robustness to perturbations, we extracted new quantitative  
29 insights from these three published experimental datasets. Our analysis provides a foundation to  
30 quantify cross-feeding interactions from experimental data, and highlights the importance of  
31 metabolic exchanges in the dynamics and stability of microbial communities.

## 32 **Author summary**

33 The behavior of microbial communities such as the human microbiome is hard to predict by its  
34 species composition alone. Our efforts to engineer microbiomes—for example to improve human  
35 health—would benefit from mathematical models that accurately describe how microbes exchange  
36 metabolites with each other and how their environment shapes these exchanges. But what is an  
37 appropriate level of details for those models? We propose an intermediate level to model metabolic  
38 exchanges between microbes. We show that these models can accurately describe population  
39 dynamics in three laboratory communities and predicts their stability in response to perturbations  
40 such as changes in the nutrients available in the medium that they grow on. Our work suggests that  
41 a highly detailed metabolic network model is unnecessary for extracting ecological insights from  
42 experimental data and improves mathematical models so that one day we may be able to predict  
43 the behavior of real-world communities such as the human microbiome.

## 44 **Introduction**

45 Most microorganisms that affect the environments we live in<sup>1</sup> and that impact our health<sup>2</sup> do not  
46 live in isolation: they live in complex communities where they interact with other strains and  
47 species. The past decade has seen a surge of scientific interest in microbial communities, such as  
48 the human microbiome, but most studies remain limited to cataloguing community composition<sup>3</sup>.  
49 Our mechanistic understanding of how biochemical processes occurring inside individual  
50 microbial cells command interaction between cells, and lead to the emergent properties of multi-  
51 species communities remains limited<sup>4</sup>.

52 Microorganisms consume, transform and secrete many kinds of chemicals, including  
53 nutrients, metabolic wastes, extracellular enzymes, antibiotics and cell-cell signaling molecules  
54 such as quorum sensing autoinducers<sup>5-8</sup>. The chemicals produced by one microbe can impact the  
55 behaviors of others by promoting or inhibiting their growth<sup>9</sup>, creating multi-directional feedbacks  
56 that can benefit or harm the partners involved<sup>10,11</sup>.

57 If a community is well-characterized and given sufficient data on population dynamics, it  
58 should be possible to parameterize the processes involved in microbe-microbe interactions by  
59 fitting mathematical models<sup>12</sup>. Any model can potentially yield insights<sup>13</sup>, but the complexity of  
60 most models so far has been either too high for parameterization<sup>14</sup>, or too low to shed light on  
61 cellular mechanisms<sup>15</sup>. Microbial processes may be modelled across a range of details: At the low  
62 end of the spectrum we have population dynamic models such as generalized Lotka-Volterra  
63 (gL<sup>V</sup>)<sup>16</sup> and Consumer-Resource (C-R) models<sup>17</sup>, which treat each organism as a ‘black-box’. For  
64 example, C-R models assume a linear or Monod dependence of microbial growth on resource  
65 uptake kinetics. At the high end of the spectrum, we have detailed single-cell models such as  
66 dynamic flux balance analysis (dFBA)<sup>18</sup> and agent-based models<sup>19</sup> that have too many parameters

67 to be parameterizable by experimental data. For example, the linear equations for fluxes obtained  
68 from quasi-steady-state assumption of dFBA are underdetermined. What is an appropriate level of  
69 detail to model and constrain microbial processes using data, to produce accurate predictions as  
70 well as new mechanistic insights?

71 Here we propose a generalizable framework that couples classical ecological models of  
72 population and resource dynamics with coarse-grained intra-species metabolic networks. We show  
73 that modeling communities at this intermediate scale can accurately quantify metabolic processes  
74 from population dynamics data acquired in the laboratory. We demonstrate the approach on three  
75 evolved/engineered communities of *Escherichia coli* (*E. coli*) strains with increasing levels of  
76 complexity: (1) unilateral acetate-mediated cross-feeding<sup>20</sup>, (2) bilateral amino-acid-mediated  
77 cross-feeding between leucine and lysine auxotrophies<sup>21</sup>, and (3) multilateral amino-acid-mediated  
78 cross-feeding between 14 distinct amino acid autotrophies<sup>22</sup>. The parameterized models report  
79 inferred leakage fractions of metabolic byproducts that are difficult to measure directly by  
80 experiments, reveal how resource supply and partitioning alter the coexistence and ecological  
81 relationships between cross-feeders, and predict the limits of community robustness against  
82 external perturbations.

83

## 84 **Results**

85 **Modeling microbial metabolic processes at an intermediate level.** Inspired by the classical  
86 MacArthur's CR models<sup>23</sup> and many follow-ups<sup>17,24-26</sup>, we propose to integrate CR models with a  
87 coarse-grained yet mechanistic description of cell metabolism. Metabolic reactions can be broadly  
88 classified as catabolic and anabolic, where catabolic reactions break down complex substrates from  
89 culture media into smaller metabolic intermediates that can be used to build up biomass

90 components by anabolic reactions. A minimal representation of cell metabolism is a three-layer  
91 network composed of growth substrates at the top, building block metabolites in the middle, and  
92 biomass at the bottom (Fig. 1). The growth substrates can be either substitutable (e.g., glucose and  
93 acetate) or non-substitutable (e.g., glucose and ammonium); however, in our model we consider  
94 only the non-substitutable building blocks for cell growth. In fact, substitutable metabolites can be  
95 mathematically lumped into complementary functional groups that together make a non-  
96 substitutable group when coarse-graining metabolic network. Despite its simplicity, this model is  
97 flexible enough to describe the transformation of resources into other resources, non-consumable  
98 chemicals and biomass, regardless of the specific reactions involved.

99         Based on these assumptions, we developed a dynamic modeling framework that contains  
100 eight kinds of biochemical reactions describing resource uptake, transformation, secretion,  
101 utilization, and degradation (Fig. 1, Supplementary Texts 1.1). Briefly, substrates available in the  
102 growth media can be imported into cells. A certain fraction of the imported substrates is then  
103 broken down into building block metabolites, which can be released back to the surrounding  
104 environment, used by cells for biomass production, consumed by other non-growth processes, and  
105 degraded. Secretable metabolites, when released, can be imported by cells in a way similar to  
106 externally supplied substrates, except that their uptake may be inhibited by other substitutable  
107 substrates that are assumed to be preferentially used (e.g., catabolite repression). The dynamics of  
108 population size change is affected by two elements: population growth and cell death, where the  
109 former may depend on both building blocks and substrates. Here the substrate dependency lumps  
110 the growth effects from metabolites that are not explicitly modeled, which can substantially reduce  
111 model size by defining and choosing model variables for only metabolites known to mediate

112 interpopulation interactions. To model the effects of toxic compounds<sup>27</sup> we allow the growth rate  
 113 of any cell population can be inhibited by accumulation of toxic metabolites in the environment.

114 The eight types of reactions can be translated to differential equations. We assumed quasi-  
 115 steady-state for intracellular substrates and metabolites, as metabolic reactions typically occur at  
 116 faster time scales compared to ecological dynamics. The time-scale separation thus simplifies our  
 117 model by excluding intracellular variables, leaving only three types of variables that describe the  
 118 population density of active cells ( $N_l$ ,  $l = 1, 2, \dots, n_c$ ), the extracellular concentrations of  
 119 substrates ( $[S_i]$ ,  $i = 1, 2, \dots, n_s$ ), and the concentrations of metabolic byproducts excreted by cells  
 120 ( $[M_j]$ ,  $j = 1, 2, \dots, n_m$ ). Assuming a chemostat environment with dilution rate  $D$  (which reduces  
 121 to a batch culture when  $D = 0$ ), the differential equations associated with the three state variables  
 122 are given below (Supplementary Equations (9)-(11))

$$\frac{d[S_i]}{dt} = D(S_{0,i} - [S_i]) - \sum_{l=1}^{n_c} J_{l,i}^{upt,S} N_l \quad (1)$$

$$\frac{dN_l}{dt} = N_l(J_l^{grow} - J_l^{death} - D) \quad (2)$$

$$\frac{d[M_j]}{dt} = D(M_{0,j} - [M_j]) + \sum_{l=1}^{n_c} (J_{l,j}^{leak,M} - J_{l,j}^{upt,M}) N_l \quad (3)$$

123 where  $S_{0,i}$  and  $M_{0,j}$  are the feed medium concentrations of substrate  $S_i$  and metabolite  $M_j$   
 124 respectively.  $J_{l,i}^{upt,S}$  and  $J_{l,j}^{upt,M}$  represent uptake fluxes of substrates and metabolites respectively,  
 125  $J_{l,j}^{leak,M}$  are metabolite secretion fluxes, and  $J_l^{grow}$  and  $J_l^{death}$  stand for per-capita growth and death  
 126 rates respectively. We used Monod kinetics for resource uptake ( $J_{l,i}^{upt,S}$  and  $J_{l,j}^{upt,M}$ ; Supplementary  
 127 Equation (16) and (17)), derived mathematical expressions for metabolite leakage ( $J_{l,j}^{leak,M}$ ;   
 128 Supplementary Equation (18) and (19)) and biomass production ( $J_l^{grow}$ ; Supplementary Equation

129 (20)) using the Liebig's Law of the Minimum<sup>28</sup> (growth rate is proportional to the flux of the  
130 scarcest resource), and modelled cell death using first-order kinetics with constant specific  
131 mortality rate ( $J_t^{death}$ ; Supplementary Equation (23)). The functional forms of these kinetic laws  
132 and other details of model derivation are described in Supplementary Texts 1.1.

133

134 **Example 1: unilateral acetate-mediated cross-feeding.** We first applied our modeling  
135 framework to a well-documented unilateral acetate-mediated cross-feeding polymorphism evolved  
136 from a single ancestral lineage of *E. coli* in laboratory conditions<sup>20</sup> (Supplementary Texts 1.2.1).  
137 The community contains two polymorphic subpopulations (*E. coli* subspecies) whose metabolism  
138 differs in their quantitative ability to uptake and efflux carbon sources: a glucose specialist strain  
139 (CV103) which has a faster glucose uptake rate but cannot grow on acetate, and an acetate  
140 specialist strain (CV101) which can grow on acetate but has a lower glucose uptake rate. CV103  
141 secretes acetate—a major by-product of its aerobic metabolism—and this way creates a new  
142 ecological niche for CV101. For simplicity, we assumed that glucose and acetate are fully  
143 substitutable resources since *E. coli* cells can grow on either carbon source with similar yields  
144 (Supplementary Texts 1.2.2). Compared to its complete form (Supplementary Fig. 1), the  
145 simplified model diverts all glucose flux to acetate that acts as the only growth limiting factor (Fig.  
146 2A). Using parameters estimated by manual fitting (Materials and methods, Supplementary Table  
147 1), we show that the model accurately reproduced the observed changes in growth and acetate  
148 concentration in both monoculture and coculture experiments over time (Fig. 2B-E). Particularly,  
149 Fig. 2D shows that acetate is toxic to both strains and CV101 is more susceptible. Although Fig.  
150 2E shows coexistence of CV101 and CV103 within 40 generations, our model predicts that CV103  
151 would be eventually excluded from the community in the long run (Supplementary Fig. 2).



152           The simplified model has 11 parameters, including 8 free parameters, 2 parameters fixed  
153 at literature values, and 1 biological constant (Supplementary Table 1). To assess parameter  
154 uncertainty, we sampled posterior distribution of all free parameters using Markov-Chain-Monte-  
155 Carlo (MCMC) algorithm (Material and methods), finding that their medians coincide well with  
156 the default values obtained by manual fitting and used in the simulations (Supplementary Fig. 3,  
157 Supplementary Table 1). Compared to other free parameters,  $C_{1,g}$  (half maximum inhibitory  
158 concentration of glucose for acetate uptake by CV101) and  $I_{3,a}$  (half maximum inhibitory  
159 concentration of acetate for CV103 growth) have much wider distributions, suggesting the dataset  
160 (Fig. 2B-E) used to constrain the model is relatively insensitive to changes in their values. We did  
161 not find strong correlations among parameters, except for the maximum glucose uptake rate of  
162 CV101 and CV103 ( $V_{1,g}$  and  $V_{3,g}$  respectively), which has a Pearson correlation coefficient (PCC)  
163 99.6%. Particularly, the distribution of the acetate leakage fraction has a median 36.7% with  
164 interquartile range from 29.8% to 44.6%, which is consistent with the manually optimized value  
165 33.0%. This value suggests that both cell types have nearly equal carbon flux values between  
166 acetate secretion and glucose uptake, a quantitative relationship that has been observed in a  
167 different *E. coli* strain<sup>29</sup>. The high efflux of acetate may be a consequence of adaptive co-evolution  
168 and accumulation of degenerative mutations<sup>20</sup>.

169           Our model indicated that the competition outcome depends on the acetate level in the feed  
170 medium (Fig. 2E): CV103 dominates the community without acetate supplementation while  
171 CV101 dominates when 1 mM acetate was supplemented. Fig. 2F outlines the region in the  
172 nutritional space when CV101 grows faster than (gray shading) and equal to (shading boundary)  
173 CV103. The region has a bell shape with the maximum at 0.81 mM glucose and is almost  
174 symmetric around 1 mM acetate. The dose-dependent growth effects can be explained by the

175 conflicting role of acetate which is both a source of carbon and a toxic waste. Acetate at low  
176 concentration serves as nutrient for CV101 and increases its growth rate. However, too much  
177 acetate is toxic and has stronger inhibitory effects on the growth of CV101 compared to CV103  
178 (Fig. 2D). The growth advantage of CV101 conferred by an intermediate level of acetate can be  
179 negated at high glucose level ( $> 0.81$  mM) due to strong carbon catabolite repression resulting in  
180 reduced assimilation of acetate by CV101.

181

182 **Coexistence of CV101 and CV103.** Coexistence of CV101 and CV103 requires that the growth  
183 rate of both strains is equal to the dilution rate. The nutritional space has two solutions (Fig. 2F,  
184 gray circles) that satisfy the criteria at dilution rate of  $0.2 \text{ h}^{-1}$  (the value used in the experiment<sup>20</sup>).  
185 We then constructed a phase diagram (Fig. 2G) that spans a wide range of acetate leakage fraction  
186 and the feed medium glucose concentration via simulations. Since acetate is not supplemented,  
187 increasing glucose supplementation induces higher release of acetate to the environment. The  
188 entire phase space is divided into five distinct regions with four outcomes, including population  
189 collapse, extinction of CV103 (CV101 wins), extinction of CV101 (CV103 wins) and stable  
190 coexistence. In general, CV103 wins when the supplementation level of glucose is either very low  
191 (acetate level is too low to compensate for the growth disadvantage of CV101 due to slower  
192 glucose uptake) or very high (acetate level is too high to be toxic and strongly inhibits CV101).  
193 Stable coexistence can be maintained within a narrow range of acetate leakage fraction. We show  
194 that the coexistence region is robust to changes in the two most uncertain parameters determined  
195 by MCMC (Supplementary Fig. 4). Note that the narrow coexistence regime does not necessarily  
196 conflict with the observed transient coexistence in Fig. 2E because the theoretical phase diagram  
197 was constructed at steady state when time goes to infinity.

198 Using Chesson's coexistence theory<sup>30</sup>, the boundaries of the coexistence region can be  
199 interpreted as the conditions when the fitness (growth rate) difference between CV101 and CV103  
200 is exactly balanced by the stabilizing effects of their niche differences (differential use of carbon  
201 sources; in general, it is a collective name for all mechanisms that lower interspecific competition  
202 relative to intraspecific competition). When acetate is not leaked (i.e., the acetate leakage fraction  
203 is 0), there is no niche difference (the only available carbon source is glucose) and the fitness  
204 difference is determined by the basal growth advantage of CV103 due to faster glucose uptake rate.  
205 Increasing leakage fraction of acetate leads to higher niche difference since acetate accumulation  
206 in the culture allows CV101 to utilize acetate as alternative carbon source and effectively reduces  
207 inter-population competition with CV103 for glucose. Meanwhile, increased acetate leakage also  
208 causes CV101 to grow faster, first reducing the fitness difference between the two strains to 0 (by  
209 overcoming its basal growth disadvantage) and increasing the difference afterwards. As the acetate  
210 leakage fraction increases, the lines of niche and fitness difference can possibly have two  
211 intersection points (Supplementary Fig. 5), between which CV101 and CV103 coexist stably  
212 because their fitness difference is smaller than their niche difference.

213

214 **Example 2: bilateral amino-acid-mediated cross-feeding.** The second community is  
215 characterized by a synthetic cross-feeding mutualism between lysine and leucine auxotrophies of  
216 *E. coli*<sup>21</sup> (Supplementary Texts 1.3.1). The two mutants differ only by single gene deletions in the  
217 lysine ( $\Delta lysA$ ) and leucine ( $\Delta leuA$ ) biosynthesis pathways. Neither mutant can grow in  
218 monoculture, but their coculture can survive by exporting essential amino acids that are needed by  
219 their partners to the extracellular environment and developing a bidirectional, obligate relationship.  
220 For simplicity, we assumed (1) leucine or lysine does not limit growth of the strain that synthesizes

221 it *de novo* (i.e., its producing strain); (2) environment leucine or lysine is not assimilated by its  
222 producing auxotrophic strain (Supplementary Texts 1.3.2). Using MCMC algorithm to estimate  
223 parameter values of the model that does not take these assumptions (Supplementary Fig. 6), we  
224 justified the second assumption by showing that the amino acid uptake rates by their producing  
225 strains are 1-2 orders of magnitude lower than the rates by their non-producing strains  
226 (Supplementary Fig. 7), suggesting that the majority of amino acids in the environment are  
227 assimilated by their auxotrophies. However, it is important to note that the assumption is specific  
228 to nutrient auxotrophies and may not be generalized to non-auxotrophic, wild-type cells. For  
229 example, wild-type *E. coli* cells that are able to synthesize all amino acids *de novo* still grow faster  
230 when supplemented with additional amino acids. Using parameters obtained through manual  
231 fitting (Materials and methods, Supplementary Table 2), we show that the simplified model (Fig.  
232 3A) remains effective for quantitatively reproducing the growth and nutrient dynamics in both  
233 monoculture and coculture conditions (Fig. 3B,C).

234 The simplified model has 15 parameters, including 9 free parameters, 4 parameters fixed  
235 at literature values, and 2 biological constants (Supplementary Table 2). MCMC simulations  
236 confirmed that the posterior median of the free parameters and their values obtained from manual  
237 fitting are close to each other (Supplementary Fig. 8, Supplementary Table 2), except that we  
238 underestimated the mortality rate constant of the leucine auxotroph ( $\eta_{\Delta l}$ ). Relative to other free  
239 parameters, the distributions of  $K_g$  (half-maximal concentration for glucose uptake),  $\eta_{\Delta k}$   
240 (mortality rate constant of the lysine auxotroph), and  $\eta_{\Delta l}$  are much wider and span orders of  
241 magnitudes, suggesting that they are loosely constrained by experimental data. In addition, strong  
242 negative correlations between the maximum uptake rate and yield of the two amino acids (PCC =  
243 -86.9% and -65.5% for leucine and lysine respectively) were found. Finally, the engineered

244 interaction between the lysine and leucine auxotrophies is much weaker with only 0.66%  
245 (interquartile range [0.52%, 0.85%]) leucine and 1.13% (interquartile range [0.91%, 1.41%])  
246 lysine released back to the environment (their corresponding values obtained through manual  
247 fitting are 0.32% and 1.39% respectively), compared to the evolved acetate-mediated cross-  
248 feeding interaction (~30% acetate leakage) we studied in Example 1.

249

250 **Coexistence of the lysine and leucine auxotrophies.** We sought to explore when the two  
251 auxotrophic strains coexist in chemostat. Fig. 3D shows the phase diagram at different  
252 combinations of the lysine and leucine leakage fraction via simulations. We did not see competitive  
253 exclusion, which is expected because the interdependence between the two strains is mutually  
254 obligate. It is important to note from Fig. 3D that the minimum leakage fraction of leucine (5.50%)  
255 and lysine (9.50%) required by coexistence at dilution rate  $0.1 \text{ h}^{-1}$  are far larger than the actual  
256 secreted percentages that we fit from experimental data (posterior median 0.66% and 1.13% for  
257 leucine and lysine leakage respectively), suggesting that the two engineered strains may not be  
258 able to coexist in such condition (but they may coexist at lower dilution rate). Interestingly, the  
259 bottom left boundary of the coexistence region describes a negative interaction between the  
260 minimum of the two leakage fractions, suggesting that decreasing leakage of one amino acid must  
261 be compensated by increasing leakage of the other in order to satisfy the minimum requirement of  
262 coexistence.

263 Coexistence is possible in the majority of the phase space, suggesting that the community  
264 is insensitive to the changes in the leakage rates. A striking feature of the diagram is that, increasing  
265 the fraction of lysine leakage fraction may trigger a discontinuous, abrupt switch from a steady  
266 state dominated by the leucine auxotroph (regime R1) to a steady state dominated by the lysine

267 auxotroph (regime R2). Such abrupt, discontinuous regime shifts are a common feature of  
268 microbial communities limited by several essential nutrients<sup>31</sup>. What accompanies with the  
269 compositional shift is the qualitative change in the nutrient utilization strategies adopted by the  
270 two strains (Fig. 3E). Before the switch, growth of the lysine auxotroph is limited by shared  
271 glucose while that of the leucine auxotroph is limited by leucine secreted by the lysine auxotroph.  
272 When the lysine leakage fraction increases over the threshold of the shift, the lysine auxotroph is  
273 limited by lysine secreted by the leucine auxotroph while the leucine auxotroph is limited by shared  
274 glucose. Our results indicate that the cellular metabolic strategies that are needed to maintain stable  
275 coexistence of the two amino acid auxotrophies vary in a discontinuous manner with continuous  
276 changes in amino acid leakage fractions.

277

### 278 **Supplementation of cross-fed metabolites can reverse the sign of microbial social interactions.**

279 Cross-feeding interactions within a microbial community may be described as social interactions  
280 with costs and benefits to the members involved<sup>32,33</sup>. Those costs and benefits can be altered by  
281 environmental perturbations that supply or remove the cross-fed metabolites from the environment.  
282 Using the bilateral amino-acid-mediated cross-feeding model, we investigated how the  
283 supplementation of amino acids affected ecological relationships between cross-feeders at the  
284 steady state (Material and methods).

285 The phase space that spans a wide range of the leucine and lysine concentrations in the  
286 feed medium suggest four possible ecological relationships, including competition, amensalism,  
287 mutualism and parasitism (Fig. 4A). Mutualism was maintained over a broad range of supplied  
288 amino acid concentrations, even though amino acid supplementation releases the dependence of  
289 one auxotroph on the other and is hence detrimental to the mutualistic relationship. In the

290 mutualism regime, glucose is in excess and both amino acid auxotrophies are limited by the  
291 essential amino acids they cannot produce (Fig. 4B, left column). Further addition of amino acids  
292 leads to compositional dominance of one auxotrophic strain, but not necessarily competitive  
293 exclusion. Supplementation of leucine destabilizes the community by excluding the lysine  
294 auxotroph (Fig. 4B, middle column), whereas adding lysine only reduced the relative abundance  
295 of the leucine auxotroph, rather than leading to the loss of its entire population (Fig. 4B, right  
296 column). These results suggest that adding cross-fed nutrients can induce competition between  
297 community members that previously interacted mutualistically, and shift positive interactions to  
298 negative interactions.

299         Why supplementation of lysine and leucine cause such asymmetrical long-term effects on  
300 the community's composition and stability? We found that the outcome may be dependent on  
301 whether one or both auxotrophies is limited by glucose. When glucose limits both auxotrophies  
302 (Fig. 4B, middle column), competitive exclusion occurs and the leucine auxotroph wins because  
303 it has the same glucose uptake kinetics as the lysine auxotroph but lower mortality rate  
304 (Supplementary Table 2). When only the lysine auxotroph is limited by glucose (Fig. 4B, right  
305 column), the leucine auxotroph can sustain its population by growing on leucine released by its  
306 competitor. Whether coexistence of the two auxotrophies remains stable with increased level of  
307 amino acids supplementation can also be understood from the conditions when the net growth rate  
308 (growth rate minus mortality rate) of both populations equal to the dilution rate in the nutritional  
309 space (Fig. 4C). Coexistence requires that the steady state leucine must be equal to  $5.25 \times 10^{-4}$   
310 mM, suggesting that supplementing too much leucine would devastate the ability of the system to  
311 self-regulate and reach that level at steady state. By contrast, a solution with high lysine

312 concentration is always feasible, which explains why coexistence can be maintained at very high  
313 level of lysine supplementation.

314

315 **Example 3: multilateral cross-feeding between 14 amino acid auxotrophies.** To further  
316 demonstrate the utility of our modeling framework, we studied cross-feeding interactions within  
317 communities of more than two members. We modeled a community of 14 amino acid auxotrophies  
318 engineered from *E. coli* by genetic knockout<sup>22</sup> (Fig. 5A). The 14-auxotroph model was directly  
319 extended from the 2-auxotroph model developed above by considering each auxotroph can  
320 potentially release all other 13 amino acids to the shared environment (Supplementary Texts 1.4.1).  
321 Although all feeding possibilities are known, the consumer feeding preferences are not. By fitting  
322 experimental data on the population compositions we aimed to infer the unknown feeding  
323 pattern—what amino acids and how much they are released by each auxotrophic strain to feed  
324 each other.

325 The model has 269 parameters, including 219 free parameters, 36 parameters fixed at  
326 literature values, and 14 biological constants. Parameter values were obtained through both  
327 automatic (amino acid leakage fractions) and manual (the rest) data fitting (Material and methods,  
328 Supplementary Table 3). We show that the fit gave an excellent match to the observed population  
329 density fold changes in pairwise cocultures (Fig. 5B, PCC = 94%), except for cross-feeding pairs  
330 whose fold change values are less than 1. The observed reduction in population density may be  
331 caused by cell death in the absence of nutrients but it is difficult to know because the measurement  
332 of optical density at low inoculation amount ( $10^7$  cells/mL) is highly noisy. For simplicity, we  
333 assumed no cell death and set mortality rates to zero in the simulation, which explains why the  
334 simulated population density fold changes are always non-decreasing. To compare our model with



335 higher-level models that do not include explicit nutrients, we adopted a Lotka-Volterra (LV) type  
336 model used in the literature<sup>22,33</sup>, which guarantees that cross-feeding is obligate for growth

$$\frac{dx_1}{dt} = C_{1,2}x_2 \left( \frac{x_1}{x_1 + b} \right) \left( 1 - \frac{x_1 + x_2}{k} \right) \quad (4)$$

$$\frac{dx_2}{dt} = C_{2,1}x_1 \left( \frac{x_2}{x_2 + b} \right) \left( 1 - \frac{x_1 + x_2}{k} \right) \quad (5)$$

337  $x_1$  and  $x_2$  are cell densities of any two amino acid auxotrophies,  $C_{1,2}$  and  $C_{2,1}$  are their cooperative  
338 coefficients,  $b$  is a constant that tunes the saturation concentration of  $x_1$  and  $x_2$ , and  $k$  is another  
339 constant that represents carrying capacity. We show that the LV-type model can at best achieve a  
340 PCC of 33%, using parameters optimized by MCMC algorithm (i.e., parameters from the MCMC  
341 sample with the highest PCC). Although this LV-type model has a smaller number of parameters  
342 than ours (198 vs. 269), the number of free parameters between the two models is of similar size  
343 and comparable (198 vs. 205; note that 14 mortality rates in our model were set to zero).

344 Fig. 5C reports the estimated leakage fractions of 14 amino acids by their amino acid  
345 auxotrophies in a matrix form. Although the 14 auxotrophies were derived from the same parent  
346 strain, they showed very different profiles of amino acid leakage: some auxotrophies such as the  
347 methionine auxotroph  $\Delta M$  (36.41% total carbon loss) are highly cooperative whereas others such  
348 as the tryptophan auxotroph  $\Delta W$  (1.37% total carbon loss) have very low cooperativity. These  
349 differences may be attributed to how metabolic network structure was disrupted to generate the  
350 auxotrophies and the concomitant changes in metabolic fluxes. One such example is the strong  
351 release (13.32%) of threonine by the methionine auxotroph. Since methionine and threonine  
352 biosynthesis pathways branch off from the same precursor homoserine, block of one pathway may  
353 lead to increased fluxes of another pathway and leakage of corresponding amino acids. However,  
354 the leakage fraction of methionine by the threonine auxotroph is very low (0.1%), suggesting that

355 network topology is not the only factor that affects leakage flux. Since methionine is the most  
356 expensive amino acid to produce in terms of ATP consumption<sup>34</sup>, its biosynthesis and leakage rates  
357 may be tightly regulated and only loosely depend on the level of its precursors.

358

359 **The 14-member community converges to a stable coexisting subset at steady state.** Besides  
360 the pairwise coculture data (Fig. 5B), our model also reproduced the population dynamics of  
361 serially diluted cocultures of all 14 auxotrophies and four selected 13-auxotroph combinations (Fig.  
362 6A). The fit is reasonably good at the log scale, except for the methionine-auxotroph-absent  
363 community which seems to undergo non-ecological processes that rescue the threonine auxotroph  
364 ( $\Delta T$ ) from the brink of extinction between day 2 and day 3. Quantitatively, the PCCs between  
365 observed and predicted values on the log scale are 88.71% (all 14 auxotrophies), 75.30% (lysine-  
366 auxotroph-absent), 78.34% (arginine-auxotroph-absent), 52.93% (threonine-auxotroph-absent),  
367 and 8.90% (methionine-auxotroph-absent).

368 As shown in Fig. 6A, most amino acid auxotrophies were diluted away very quickly but  
369 some, such as the isoleucine auxotroph ( $\Delta I$ ), exhibited transient recovery dynamics after the initial  
370 decay. To understand the transient dynamics, we used the same model to infer the concentration  
371 dynamics of glucose and all amino acids, which are hidden states (not yet observed) that are  
372 relatively costly and inaccurate to measure in experiments. Supplementary Fig. 9 shows that the  
373 population density of the isoleucine auxotroph had an initial drop because the isoleucine pool had  
374 not been accumulated to a critical size that allows the actual growth to compensate for its mortality  
375 and system dilution. As the pool size increases, its net growth rate (growth minus mortality)  
376 surpasses the dilution rate and recovers its population density, which eventually levels off when  
377 the positive and negative effects are balanced.

378 By simulating the 14-auxotroph community model to steady state, we further predicted that  
379 the initial 14-strain mixture converges to a stable coexisting subset that contains 4 amino acid  
380 auxotrophies that are deficient in biosynthesis of isoleucine ( $\Delta I$ ), lysine ( $\Delta K$ ), methionine ( $\Delta M$ ),  
381 and threonine ( $\Delta T$ ) (Fig. 6B). The predicted coexistence state was successfully validated by two  
382 independent observations over 50-day serial dilution<sup>22</sup>, a much longer period of time than the  
383 duration of the training dataset (7-day serial dilution; Fig. 6A). The resource-consumer  
384 relationships of the 4-member community are shown in a bipartite network (Fig. 7A), where 3  
385 amino acid secretion fluxes were identified as essential (solid arrows) as their deletions resulted in  
386 community member loss (Supplementary Fig. 10). These essential fluxes suggest that the primary  
387 feeders for  $\Delta K$ ,  $\Delta M$ ,  $\Delta T$  are  $\Delta T$ ,  $\Delta I$ ,  $\Delta M$  respectively; however, none of  $\Delta K$ ,  $\Delta M$ ,  $\Delta T$  dominates  
388 the feeding of  $\Delta I$  and their contributions to the isoleucine pool in the environment are substitutable.  
389  
390 **Mutualistic cross-feeding network is prone to collapse after external perturbations.** Using the  
391 model developed above, we computationally tested how external perturbations, including nutrient  
392 downshift, the addition of antibiotics, and invasion of cheating phenotypes (the same auxotrophic  
393 dependence but no amino acid leakage) affect the stability of coexistence among the 4 auxotrophic  
394 strains that would otherwise be stable (Material and methods). The 4-member community was able  
395 to cope with these disturbances to a certain extent and remained integrated. Beyond the thresholds,  
396 all three perturbation types resulted in community collapse as a result of domino effect (Fig. 7B-  
397 D), implying that tightly coupled cooperative communities are fragile and prone to collapse. Since  
398 antibiotics inhibit growth of individual strains (targeting consumer nodes in the bipartite network)  
399 while cheaters are amino acid sinks (targeting resource nodes in the bipartite network), we  
400 identified that  $\Delta T$  and methionine as the weakest consumer node (Fig. 7C) and resource node (Fig.

401 7D) in the bipartite network respectively. Our results suggest that  $\Delta T \rightarrow K$  (secretion of lysine by  
402 the threonine auxotroph) and  $M \rightarrow \Delta M$  (uptake of methionine by the methionine auxotroph)—the  
403 outgoing links from the two weakest nodes that are also essential to maintain community  
404 integrity—are the weakest metabolic fluxes that may set the resistance level of the community to  
405 external perturbations<sup>35</sup>.

406

## 407 **Discussion**

408 Predicting population dynamics of a microbial community from interactions between its  
409 members is difficult because interaction happens across multiple scales of biological  
410 organization<sup>36</sup>. Here we propose a mechanistic ecology model based on a coarse-grained  
411 representation of cell metabolism that accurately describes the population dynamics of three  
412 laboratory communities with well-defined metabolic exchanges. Previous studies have used  
413 genome-scale models and metabolic flux analysis, but these studies require flux measurements by  
414 isotope tracing and metabolomics to fit the adjustable flux parameters. Some success was also  
415 achieved by fitting the time series data with coarser-grained ecological models<sup>37–41</sup> such as the  
416 gLV equations; however, in gLV-type models, interspecific interactions are phenomenologically  
417 defined based on density dependency, which gives little mechanistic understanding of the  
418 underlying mechanism<sup>15</sup>. By contrast, our model has explicit formulations of context dependency  
419 by representing the chemical flows within and between microbes and thus can explain the  
420 metabolic part of microbe-microbe interactions.

421 When we have limited prior knowledge and data on a given community it becomes critical  
422 to choose the right level of details. However, by applying our approach to well-defined laboratory  
423 systems, we show that a highly detailed metabolic network is not necessary for developing useful

424 ecological models. In single-bacteria studies, coarse-grained metabolic models have been  
425 employed to understand the design principles of metabolic networks and their regulation<sup>42</sup>, as well  
426 as to predict metabolic flux distributions useful for synthetic biology<sup>43</sup> and industrial<sup>44</sup> applications.  
427 Compared to genome-scale models, using coarse-grained models linking ecology and metabolism  
428 is simple and has recently become popular<sup>26,45,46</sup>. Depending on the research question, a coarse-  
429 grained metabolic network can be created at any level of granularity from a single reaction to the  
430 complete whole genome-scale reconstruction. The choice of granularity and how to derive a  
431 simpler model from the more complex one are usually empirical but can be facilitated by more  
432 systematic approaches to reduce dimensionality.

433         Our model could extract new insights from those previously published empirical data on  
434 well-defined laboratory systems. The analysis shows that unidirectional cross-feeding is  
435 equivalent to a commensalism and bidirectional cross-feeding is equivalent to a mutualism. As  
436 shown by our study (Fig. 2-4) and previous work<sup>27,32</sup>, the actual relationship between cross-feeders,  
437 however, can be diverse in simple environments (e.g., glucose minimal medium) with constant  
438 resource supply due to a combination of positive effects of cross-feeding with negative effects of  
439 competition and toxicity of cross-fed metabolites, suggesting that the exact outcome cannot be  
440 precisely delineated by the cross-feeding type alone. For example, we predicted that, without  
441 supplementation of amino acids, coexistence of the leucine and lysine auxotrophies can only be  
442 achieved when one strain is limited in growth by glucose while the other strain is limited by the  
443 amino acid it is auxotrophic for (Fig. 3E). Although it is theoretically possible that growth of the  
444 two auxotrophies is simultaneously limited by the amino acids they are auxotrophic for (i.e., the  
445 lysine auxotroph limited by lysine and the leucine auxotroph limited by leucine), this interaction  
446 pattern does not occur in the phase diagram because glucose will always be sufficiently depleted

447 to a level that becomes growth limiting to at least one strain. The control of resource pool  
448 availability via population dynamics has been demonstrated to be a key mechanism for microbial  
449 community to optimize the metabolic strategy of its members to yield resistance to invasions and  
450 to achieve maximum biomass<sup>46</sup>.

451       Mechanistic models including explicit nutrients and other realistic features, such as the  
452 models presented in this study, can help identify knowledge gaps<sup>47</sup>. For example, recent  
453 experiments have demonstrated that the coexistence of two carbon source specialists in the  
454 unilateral cross-feeding example is mutualistic in the sense that the consortium is fitter than the  
455 individuals<sup>48</sup>. The syntropy can be explained by a null expectation from theoretical ecology  
456 models<sup>49</sup>: the glucose specialist provides acetate in an exchange for a service provided by the  
457 acetate specialist which scavenges the acetate down to a level at which growth inhibition is  
458 insignificant. Although the mechanism of resource-service exchange has been considered in our  
459 model, the coexistence regime in the phase diagram (Fig. 2G) is competitive, rather than  
460 mutualistic. Since mutualism occurs when the reciprocal benefits associated with cross-feeding  
461 outweigh competitive costs<sup>50</sup>, our model may predict either or both of lower benefits and higher  
462 costs than needed to achieve mutualistic coexistence. Overall, the cost-benefit nature of the cross-  
463 feeding interaction between polymorphic *E. coli* strains is more complex than thought and warrants  
464 further research.

465       Our modeling framework explains well the three published experiments but has noteworthy  
466 limitations. For example, we assume that the leakage flux is proportional to the conversion rate  
467 from substrate to metabolite (proportionality assumption), rather than proportional to the internal  
468 metabolite concentration. When does this assumption remain valid and how does it break down?  
469 By leveraging our previous experiences in modeling *E. coli* growth and resource allocation<sup>43,51</sup>,

470 we developed a coarse-grained single-strain model that explicitly assumes a linear dependency of  
471 leakage rate on metabolite concentration (Supplementary Texts 1.5). We found that the  
472 proportionality assumption remains valid for an internal metabolite when its concentration was  
473 perturbed at the upstream, rather than the downstream of the metabolite (Supplementary Fig. 11).  
474 This makes sense because the proportionality assumption couples metabolite leakage with  
475 upstream biosynthesis but does not take feedback regulation from downstream reactions and  
476 metabolites into accounts. When a perturbation is imposed from the downstream side, the  
477 proportionality assumption can lead to undesired behavior such as high leakage flux at low  
478 metabolite concentration. Although the assumption remains valid in the context of the current  
479 study where resource availability is the only varying external condition, it may prevent us from  
480 generalizing our modeling framework to different types of perturbations. Future studies may  
481 correct this limitation by incorporating metabolite concentration and associated reaction kinetics.

482         So far, the current framework has been applied to well-characterized communities with  
483 known chemicals and associated interactions which provided a ground through to assess our model.  
484 Can the same approach be applied to infer community structure of complex microbiomes (e.g.,  
485 human gut microbiome) where most of the metabolic exchanges involved in microbe-microbe  
486 interactions are still unknown? Our model has the potential if some technical challenges can be  
487 solved. First, direct modeling of a real-world microbiome with hundreds of species would be  
488 hurdled by too many unknown model parameters. One way to solve this problem is to simply  
489 ignore the rare species<sup>38</sup>. Another—arguably better—approach might be by grouping species  
490 composition into functional guilds using unsupervised methods that infer those groups from the  
491 data alone<sup>52</sup>, or to use prior knowledge from genomics or taxonomy to create such functional  
492 groups. Second, inferring chemical mediators within a community of interacting populations is a

493 nontrivial task. It can be facilitated by prior knowledge such as searching the literature or  
494 leveraging systems biology tools such as community-level metabolic network reconstruction<sup>53</sup>.  
495 Finally, our model is nonlinear, so that an efficient and robust nonlinear regression approach for  
496 parameter estimation is essential. For a model with similar size to the 14-auxotroph community  
497 we analyzed here, non-linear optimization algorithms may fail to converge to a realistic set of  
498 parameters and manual parameter selection is often the only feasible approach. Although we  
499 primarily chose the manual method to calibrate our models in this proof-of-concept study, manual  
500 fitting is a subjective and time-consuming process, requires an expert operator with prior  
501 knowledge to choose physically and biologically realistic values, and perhaps more importantly,  
502 is unable to infer correlations among parameters. These downsides of manual parameter fitting has,  
503 at least for now, precluded it from being applied to large-scale microbial communities. On the  
504 positive side, the process of trial-and-error was greatly improved by the speed at which the  
505 intermediate-scale model runs simulations on a regular desktop computer. Beyond these technical  
506 issues, the model itself can be extended in multiple ways such as incorporating mechanisms of  
507 resource allocation<sup>46</sup>. Despite any present limitations, we anticipate that network inference using  
508 mechanism-explicit models can open new avenues for microbiome research towards more  
509 quantitative, mechanistic, and predictive science.

510

## 511 **Materials and methods**

512 **Cross-feeding models.** The modeling framework presented in this study was developed by  
513 integrating a classical ecology model for population and nutrient dynamics with a coarse-grained  
514 description of cell metabolism. Custom MATLAB R2018a (The MathWorks, Inc., Natick, MA,  
515 USA) codes were developed to perform computational simulations and analyses of all three cross-



516 feeding communities. Please refer to Supplementary Texts for a detailed description of the general  
517 modeling framework and its applications to each cross-feeding community.

518

519 **Parameter estimation.** Our goal was to manually parameterize cross-feeding models directly  
520 from experimental data, which are typically cell density and metabolite concentrations in the  
521 culture. The manual process of parameter estimation began with initial values of parameters  
522 selected to be either equal to their previously reported values or assumed to be of the same order  
523 of magnitude based on the literature data. This was followed by the iterative evaluation of model  
524 outputs and refinement until sufficient concordance between the model predictions and the  
525 experimental data is achieved.

526         The only exception of parameters that were fit automatically are the amino acid leakage  
527 fractions of the 14 amino acid auxotrophies. Under a few assumptions, our model can be simplified  
528 and exactly solved for steady state population density in pairwise cocultures (Supplementary Texts  
529 1.4.2). The values of these parameters were then estimated by minimizing the least square error  
530 between observed and calculated fold changes of population density across all pairwise batch  
531 cocultures. Once obtained, these values were fixed in the process of manually fitting the other  
532 parameters of the model.

533

534 **Parameter sensitivity analysis.** To estimate parameter uncertainty and identify their potential  
535 correlations, we used an adaptive MCMC (Markov-Chain-Monte-Carlo) method for sampling the  
536 posterior distribution of parameters under constraints of experimental data. We obtained the  
537 MATLAB code for this method from <https://github.com/mjlaine/mcmcstat>. Briefly, this method  
538 constructs a sequence of random samples in the parameter space by the Metropolis-Hastings

539 algorithm: at each iteration, the algorithm randomly picks a candidate of the next sample (i.e.,  
540 parameter set) based on the current sample value. The candidate is accepted with a probability  
541 determined by the ratio of the likelihood of the new sample to that of the current sample and the  
542 likelihood is given by a negative exponential function where the exponent is the prediction error  
543 of our model using a given parameter set. Please refer to the original publication<sup>54</sup> for details of  
544 the method.

545 We ran MCMC simulations for both 2-member communities with unilateral and bilateral  
546 cross-feeding relationships. The posterior distribution of each parameter was estimated from  
547 100,000 MCMC samples after a burn-in period of 10,000 samples. We assumed a Gaussian prior  
548 with standard deviation 0.01. We used symmetric mean absolute percentage error as the cost  
549 function that is minimized by the Metropolis-Hastings algorithm:

550 Unilateral cross-feeding:  $\frac{1}{N_{data}} \left( 0.1 \sum_{i \in Fig.2B,C} \frac{|y_{obs,i} - y_{sim,i}|}{|y_{obs,i}| + |y_{sim,i}|} + \sum_{i \in Fig.2D,E} \frac{|y_{obs,i} - y_{sim,i}|}{|y_{obs,i}| + |y_{sim,i}|} \right)$

551 Bilateral cross-feeding:  $\frac{1}{N_{data}} \sum_{i \in Fig.3B,C} \frac{|y_{obs,i} - y_{sim,i}|}{|y_{obs,i}| + |y_{sim,i}|}$

552 where  $y_{obs,i}$  is the observed datum  $i$ ,  $y_{sim,i}$  is its simulated value, and  $N_{data}$  is the total number of  
553 data points. Note that the data from different experiments have unequal weights in the unilateral  
554 cross-feeding example.

555

556 **Simulation of batch, continuous, and serially diluted culture.** Deterministic trajectories and  
557 their steady states in batch and chemostat conditions were simulated by solving the differential  
558 equations from the beginning to the end. Simulations of serial dilution transfer were slightly  
559 different in the aspect that the equations were only integrated within each day. The initial condition  
560 at the beginning of a day was obtained by dividing all population densities and nutrient

561 concentrations at the end of the previous day by the dilution factor and resetting the feed medium  
562 nutrient concentrations to their initial values at day 0.

563

564 **Classification of interspecific ecological relationship.** We simulated chemostat cocultures of the  
565 lysine and leucine auxotrophies at increasing levels of amino acid supplementation in the feed  
566 medium, and computed the net effect (+,0,-) of one population on the other by comparing to  
567 monoculture simulation. The pairwise ecological relationship between the two populations can  
568 then be determined by the signs of their reciprocal impacts<sup>55</sup>: (+,+): mutualism; (-,-): competition;  
569 (+,0) and (0,+): commensalism; (-,0) and (0,-): amensalism; (+,-) or (-,+): parasitism; (0,0): no  
570 effect.

571

572 **Network perturbation.** External perturbations were exerted upon the steady state of the 4-  
573 auxotroph community. Nutrient downshift was simulated by decreasing the feed medium  
574 concentration of glucose at the beginning of simulations. The effects of an antibiotic that inhibit  
575 growth of the amino acid auxotroph  $i$  was simulated by multiplying the growth rate of the  
576 auxotroph by an inhibitory term, i.e.,  $J_i^{grow} \rightarrow J_i^{grow} / (1 + [A]/K_i)$ , where  $[A]$  is the antibiotic  
577 concentration and  $K_i$  is the inhibition constant. We assumed antibiotic concentration remains  
578 constant and chose  $K_i = 1 \mu M$ . The cheaters of each amino acid auxotroph were simulated by  
579 turning off all amino acid leakages of the auxotroph. They were mixed with the resident  
580 community in varying ratios at the beginning of simulations. For all three perturbation types, the  
581 feed medium glucose concentration is 0.2 wt.% in the unperturbed condition and serial dilution  
582 was run to steady state at 60 days.

583

## 584 **Acknowledgements**

585 We thank Dr. Michael Mee, Dr. Harris Wang, and Dr. Jennifer Reed for provision and clarification  
586 of their experimental data. We also thank Dr. Jinyuan Yan for proofreading early drafts. This work  
587 was supported by NIH grants U01 AI124275 and R01 AI137269-01 to J.B.X. The funders had no  
588 role in study design, data collection and analysis, decision to publish, or preparation of the  
589 manuscript.

590

## 591 **Data availability**

592 The simulation data that support the conclusions of this study are available from the main text  
593 and Supplementary Information. The source codes for generating the figures of this study are  
594 available from [https://github.com/liaochen1988/Source\\_code\\_for\\_cross\\_feeding\\_paper](https://github.com/liaochen1988/Source_code_for_cross_feeding_paper).

## 595 **References**

- 596 1. Kent, A. D. & Triplett, E. W. Microbial communities and their interactions in soil and  
597 rhizosphere ecosystems. *Annu. Rev. Microbiol.* **56**, 211–236 (2002).
- 598 2. Cho, I. & Blaser, M. J. The human microbiome: at the interface of health and disease. *Nat.*  
599 *Rev. Genet.* **13**, 260–270 (2012).
- 600 3. Li, H. Microbiome, Metagenomics, and High-Dimensional Compositional Data Analysis.  
601 *Annu. Rev. Stat. Appl.* **2**, 73–94 (2015).
- 602 4. Shank, E. A. Considering the lives of microbes in microbial communities. *mSystems* **3**, (2018).
- 603 5. Schmidt, R., Ulanova, D., Wick, L. Y., Bode, H. B. & Garbeva, P. Microbe-driven chemical  
604 ecology: past, present and future. *ISME J.* (2019).
- 605 6. Morris, J. J. Black Queen evolution: the role of leakiness in structuring microbial communities.

- 606 *Trends Genet.* **31**, 475–482 (2015).
- 607 7. Basan, M. *et al.* Overflow metabolism in *Escherichia coli* results from efficient proteome  
608 allocation. *Nature* **528**, 99–104 (2015).
- 609 8. Paczia, N. *et al.* Extensive exometabolome analysis reveals extended overflow metabolism in  
610 various microorganisms. *Microb. Cell Fact.* **11**, 122 (2012).
- 611 9. Hao, T. *et al.* The Genome-Scale Integrated Networks in Microorganisms. *Front. Microbiol.*  
612 **9**, 296 (2018).
- 613 10. Morris, B. E. L., Henneberger, R., Huber, H. & Moissl-Eichinger, C. Microbial syntrophy:  
614 interaction for the common good. *FEMS Microbiol. Rev.* **37**, 384–406 (2013).
- 615 11. Hibbing, M. E., Fuqua, C., Parsek, M. R. & Peterson, S. B. Bacterial competition: surviving  
616 and thriving in the microbial jungle. *Nat. Rev. Microbiol.* **8**, 15–25 (2010).
- 617 12. Hanemaaijer, M. *et al.* Systems modeling approaches for microbial community studies: from  
618 metagenomics to inference of the community structure. *Front. Microbiol.* **6**, 213 (2015).
- 619 13. Zomorodi, A. R. & Segrè, D. Synthetic ecology of microbes: mathematical models and  
620 applications. *J. Mol. Biol.* **428**, 837–861 (2016).
- 621 14. Karr, J. R. *et al.* A whole-cell computational model predicts phenotype from genotype. *Cell*  
622 **150**, 389–401 (2012).
- 623 15. Momeni, B., Xie, L. & Shou, W. Lotka-Volterra pairwise modeling fails to capture diverse  
624 pairwise microbial interactions. *Elife* **6**, (2017).
- 625 16. Coyte, K. Z., Schluter, J. & Foster, K. R. The ecology of the microbiome: Networks,  
626 competition, and stability. *Science* **350**, 663–666 (2015).
- 627 17. Niehaus, L. *et al.* Microbial coexistence through chemical-mediated interactions. *Nat.*  
628 *Commun.* **10**, 2052 (2019).

- 629 18. Mahadevan, R., Edwards, J. S. & Doyle, F. J. Dynamic flux balance analysis of diauxic growth  
630 in *Escherichia coli*. *Biophys. J.* **83**, 1331–1340 (2002).
- 631 19. Nadell, C. D., Foster, K. R. & Xavier, J. B. Emergence of spatial structure in cell groups and  
632 the evolution of cooperation. *PLoS Comput. Biol.* **6**, e1000716 (2010).
- 633 20. Rosenzweig, R. F., Sharp, R. R., Treves, D. S. & Adams, J. Microbial evolution in a simple  
634 unstructured environment: genetic differentiation in *Escherichia coli*. *Genetics* **137**, 903–917  
635 (1994).
- 636 21. Zhang, X. & Reed, J. L. Adaptive evolution of synthetic cooperating communities improves  
637 growth performance. *PLoS One* **9**, e108297 (2014).
- 638 22. Mee, M. T., Collins, J. J., Church, G. M. & Wang, H. H. Syntrophic exchange in synthetic  
639 microbial communities. *Proc. Natl. Acad. Sci. USA* **111**, E2149-56 (2014).
- 640 23. MacArthur, R. Species packing and competitive equilibrium for many species. *Theor Popul*  
641 *Biol* **1**, 1–11 (1970).
- 642 24. Marsland, R. *et al.* Available energy fluxes drive a transition in the diversity, stability, and  
643 functional structure of microbial communities. *PLoS Comput. Biol.* **15**, e1006793 (2019).
- 644 25. Tilman, D. Resource competition and community structure. *Monogr Popul Biol* **17**, 1–296  
645 (1982).
- 646 26. Brunner, J. D. & Chia, N. Metabolite-mediated modelling of microbial community dynamics  
647 captures emergent behaviour more effectively than species-species modelling. *J. R. Soc.*  
648 *Interface* **16**, 20190423 (2019).
- 649 27. LaSarre, B., McCully, A. L., Lennon, J. T. & McKinlay, J. B. Microbial mutualism dynamics  
650 governed by dose-dependent toxicity of cross-fed nutrients. *ISME J.* **11**, 337–348 (2017).
- 651 28. Liebig, J. & Playfair, L. Chemistry in its application to agriculture and physiology. (1842).

- 652 29. Enjalbert, B., Millard, P., Dinclaux, M., Portais, J.-C. & Létisse, F. Acetate fluxes in  
653 *Escherichia coli* are determined by the thermodynamic control of the Pta-AckA pathway. *Sci.*  
654 *Rep.* **7**, 42135 (2017).
- 655 30. Barabás, G., D’Andrea, R. & Stump, S. M. Chesson’s coexistence theory. *Ecol. Monogr.* **88**,  
656 277–303 (2018).
- 657 31. Dubinkina, V., Fridman, Y., Pandey, P. P. & Maslov, S. Multistability and regime shifts in  
658 microbial communities explained by competition for essential nutrients. *Elife* **8**, (2019).
- 659 32. Hammarlund, S. P., Chacón, J. M. & Harcombe, W. R. A shared limiting resource leads to  
660 competitive exclusion in a cross-feeding system. *Environ. Microbiol.* **21**, 759–771 (2019).
- 661 33. Hoek, T. A. *et al.* Resource Availability Modulates the Cooperative and Competitive Nature  
662 of a Microbial Cross-Feeding Mutualism. *PLoS Biol.* **14**, e1002540 (2016).
- 663 34. Kaleta, C., Schäuble, S., Rinas, U. & Schuster, S. Metabolic costs of amino acid and protein  
664 production in *Escherichia coli*. *Biotechnol. J.* **8**, 1105–1114 (2013).
- 665 35. Adamowicz, E. M., Flynn, J., Hunter, R. C. & Harcombe, W. R. Cross-feeding modulates  
666 antibiotic tolerance in bacterial communities. *ISME J.* **12**, 2723–2735 (2018).
- 667 36. Widder, S. *et al.* Challenges in microbial ecology: building predictive understanding of  
668 community function and dynamics. *ISME J.* **10**, 2557–2568 (2016).
- 669 37. Bucci, V. *et al.* MDSINE: Microbial Dynamical Systems INference Engine for microbiome  
670 time-series analyses. *Genome Biol.* **17**, 121 (2016).
- 671 38. Stein, R. R. *et al.* Ecological modeling from time-series inference: insight into dynamics and  
672 stability of intestinal microbiota. *PLoS Comput. Biol.* **9**, e1003388 (2013).
- 673 39. Buffie, C. G. *et al.* Precision microbiome reconstitution restores bile acid mediated resistance  
674 to *Clostridium difficile*. *Nature* **517**, 205–208 (2015).

- 675 40. Venturelli, O. S. *et al.* Deciphering microbial interactions in synthetic human gut microbiome  
676 communities. *Mol. Syst. Biol.* **14**, e8157 (2018).
- 677 41. Goldford, J. E. *et al.* Emergent simplicity in microbial community assembly. *Science* **361**,  
678 469–474 (2018).
- 679 42. Kraft, B. *et al.* Nitrogen cycling. The environmental controls that govern the end product of  
680 bacterial nitrate respiration. *Science* **345**, 676–679 (2014).
- 681 43. Liao, C., Blanchard, A. E. & Lu, T. An integrative circuit-host modelling framework for  
682 predicting synthetic gene network behaviours. *Nat. Microbiol.* **2**, 1658–1666 (2017).
- 683 44. Liao, C. *et al.* Integrated, systems metabolic picture of acetone-butanol-ethanol fermentation  
684 by *Clostridium acetobutylicum*. *Proc. Natl. Acad. Sci. USA* **112**, 8505–8510 (2015).
- 685 45. Muscarella, M. E. & O’Dwyer, J. P. Species dynamics and interactions via metabolically  
686 informed consumer-resource models. *BioRxiv* (2019). doi:10.1101/518449
- 687 46. Taillefumier, T., Posfai, A., Meir, Y. & Wingreen, N. S. Microbial consortia at steady supply.  
688 *Elife* **6**, (2017).
- 689 47. Hanemaaijer, M., Olivier, B. G., Röling, W. F. M., Bruggeman, F. J. & Teusink, B. Model-  
690 based quantification of metabolic interactions from dynamic microbial-community data. *PLoS*  
691 *One* **12**, e0173183 (2017).
- 692 48. Yang, D.-D. *et al.* Fitness and productivity increase with ecotypic diversity among *E. coli*  
693 evolved in a simple, constant environment. *BioRxiv* (2019). doi:10.1101/679969
- 694 49. Estrela, S., Trisos, C. H. & Brown, S. P. From metabolism to ecology: cross-feeding  
695 interactions shape the balance between polymicrobial conflict and mutualism. *Am. Nat.* **180**,  
696 566–576 (2012).
- 697 50. Wu, F. *et al.* A unifying framework for interpreting and predicting mutualistic systems. *Nat.*



- 698        *Commun.* **10**, 242 (2019).
- 699    51. Liao, C. Integrated modeling of bacterial metabolism. PhD thesis, University of Illinois at  
700        Urbana-Champaign (2018).
- 701    52. Gibson, T. E. & Gerber, G. K. Robust and scalable models of microbiome dynamics. *arXiv*  
702        *preprint arXiv:1805.04591* (2018).
- 703    53. Levy, R. & Borenstein, E. Metabolic modeling of species interaction in the human  
704        microbiome elucidates community-level assembly rules. *Proc. Natl. Acad. Sci. USA* **110**,  
705        12804–12809 (2013).
- 706    54. Haario, H., Laine, M., Mira, A. & Saksman, E. DRAM: Efficient adaptive MCMC. *Stat*  
707        *Comput* **16**, 339–354 (2006).
- 708    55. Faust, K. & Raes, J. Microbial interactions: from networks to models. *Nat. Rev. Microbiol.*  
709        **10**, 538–550 (2012).
- 710    56. Gudelj, I., Kinnersley, M., Rashkov, P., Schmidt, K. & Rosenzweig, F. Stability of Cross-  
711        Feeding Polymorphisms in Microbial Communities. *PLoS Comput. Biol.* **12**, e1005269 (2016).  
712

713 **Figure Legends:**

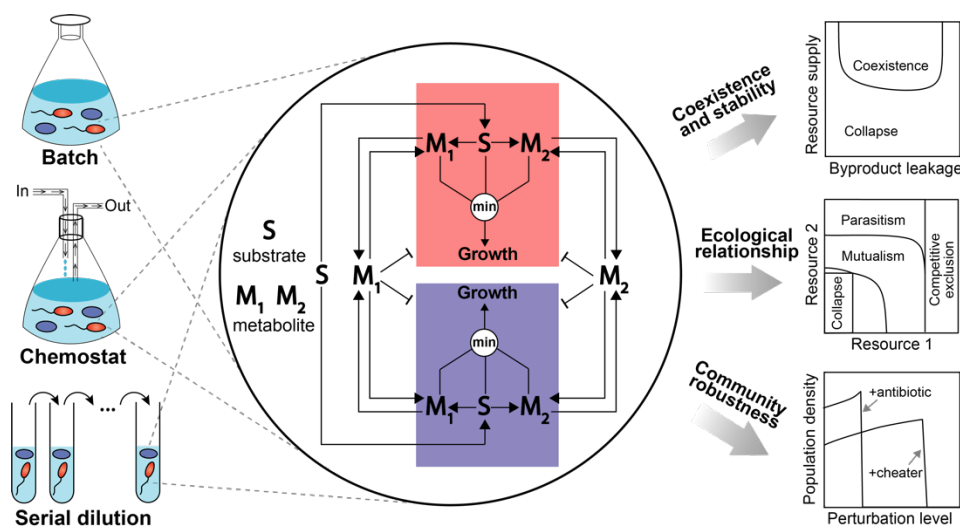

714

715 **Figure 1 | Schematic diagram illustrating our model and its potential applications in**

716 **microbial ecology research.** A distinguishing feature of our microbial community model is that

717 each community member harbors a coarse-grained metabolic network. Briefly, the metabolic

718 network transforms growth substrates (**S**) to non-substitutable building block metabolites (**M<sub>1</sub>**, **M<sub>2</sub>**)

719 and then to biomass whose production rate is set by the supply flux of the most limiting resource

720 among all substrates and metabolites. The intracellularly synthesized metabolites can be secreted

721 to the environment and then utilized by the community as public goods. For simplicity, the network

722 is visually illustrated using one substrate and two metabolites but it can be extended to any number

723 of nutrients. Enabled by the simplified metabolic network, different community members can

724 interact through a variety of mechanisms, including exploitative competitions for shared substrates,

725 cooperative exchanges of nutritional metabolites, and direct inhibition by secreting toxic

726 compounds. Using training data from batch, chemostat or serial dilution cultures, our model can

727 be parameterized to infer microbial processes underlying the data and then used to explore

728 ecological questions and generate testable predictions. Pointed arrows denote the material flow

729 and blunt-end arrows represent growth inhibition.

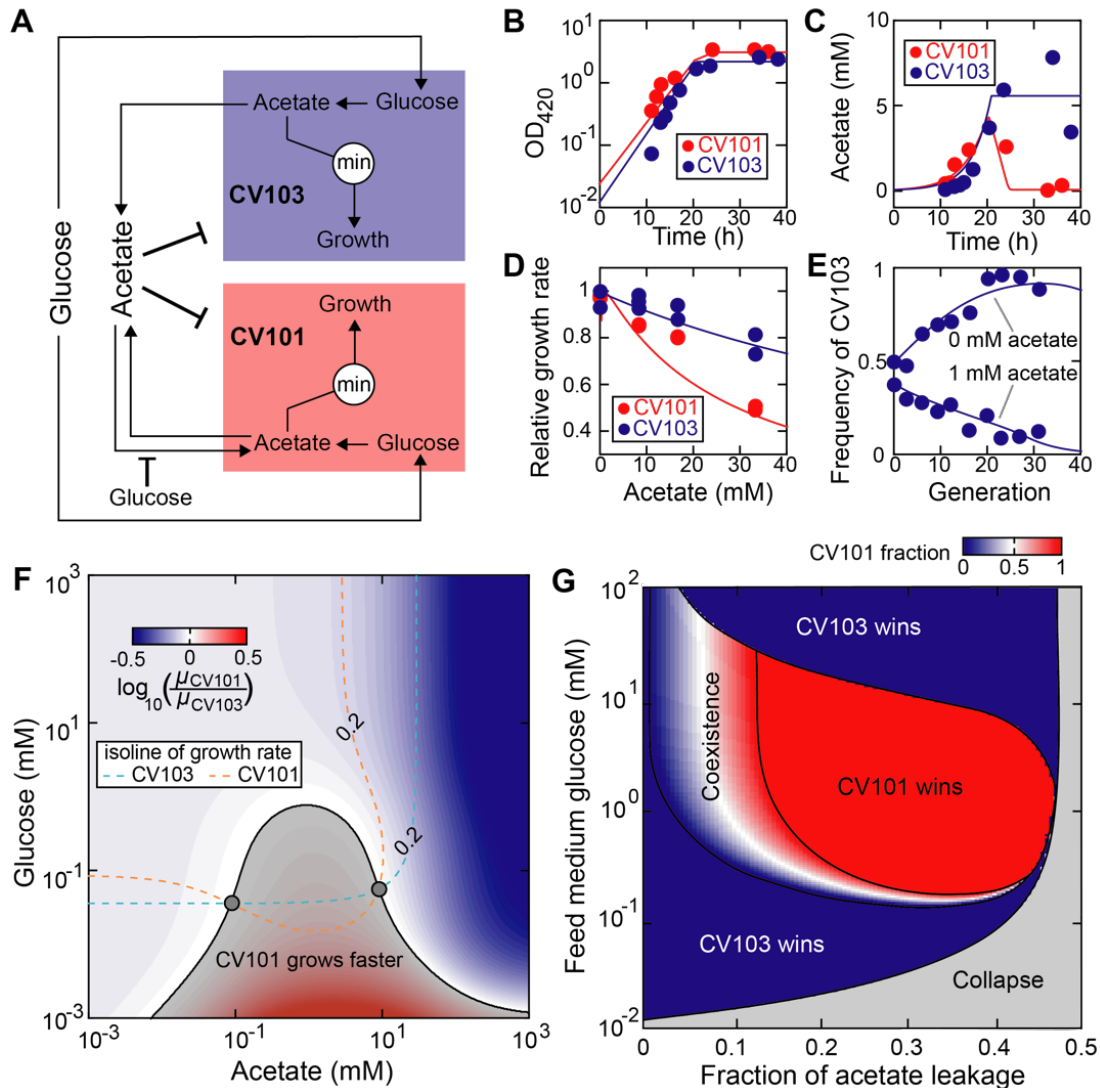

730

731 **Figure 2 | Unilateral acetate-mediated cross-feeding between evolved *E. coli* isolates. (A)**

732 Schematic diagram of the model. The glucose specialist (CV103) and acetate specialist (CV101)

733 are two *E. coli* mutants with different metabolic strategies<sup>20</sup>: the glucose specialist has improved

734 glucose uptake kinetics while the acetate specialist is able to use acetate as an additional carbon

735 source. At high concentration, acetate inhibits growth of both strains and its uptake by the acetate

736 specialist strain is weakly repressed by glucose. Since glucose and acetate are substitutable, all

737 glucose is converted to acetate which serves as the sole limiting factor for cell growth. (B-E)

738 Manual model calibration. Circles: experimental data; lines: simulations. (B,C) 0.1% glucose-

739 limited batch monoculture without supplementing acetate<sup>20</sup>. (D) 0.0125% glucose-limited batch  
740 monoculture supplemented with different concentrations of acetate<sup>56</sup>. (E) 0.00625% glucose-  
741 limited chemostat (dilution rate:  $D=0.2 \text{ h}^{-1}$ ) coculture with (1 mM) and without acetate  
742 supplementation<sup>20</sup>. The time for one generation is defined as  $\log(2)/D$ . (F) Growth rate ratio of  
743 CV101 to CV103 in the nutritional space. The gray shading indicates when CV101 grows faster  
744 than CV103 and the gray circles mark when their growth rates are both equal to the dilution rate  
745  $0.2 \text{ h}^{-1}$ . (G) The simulated steady-state phase diagram.

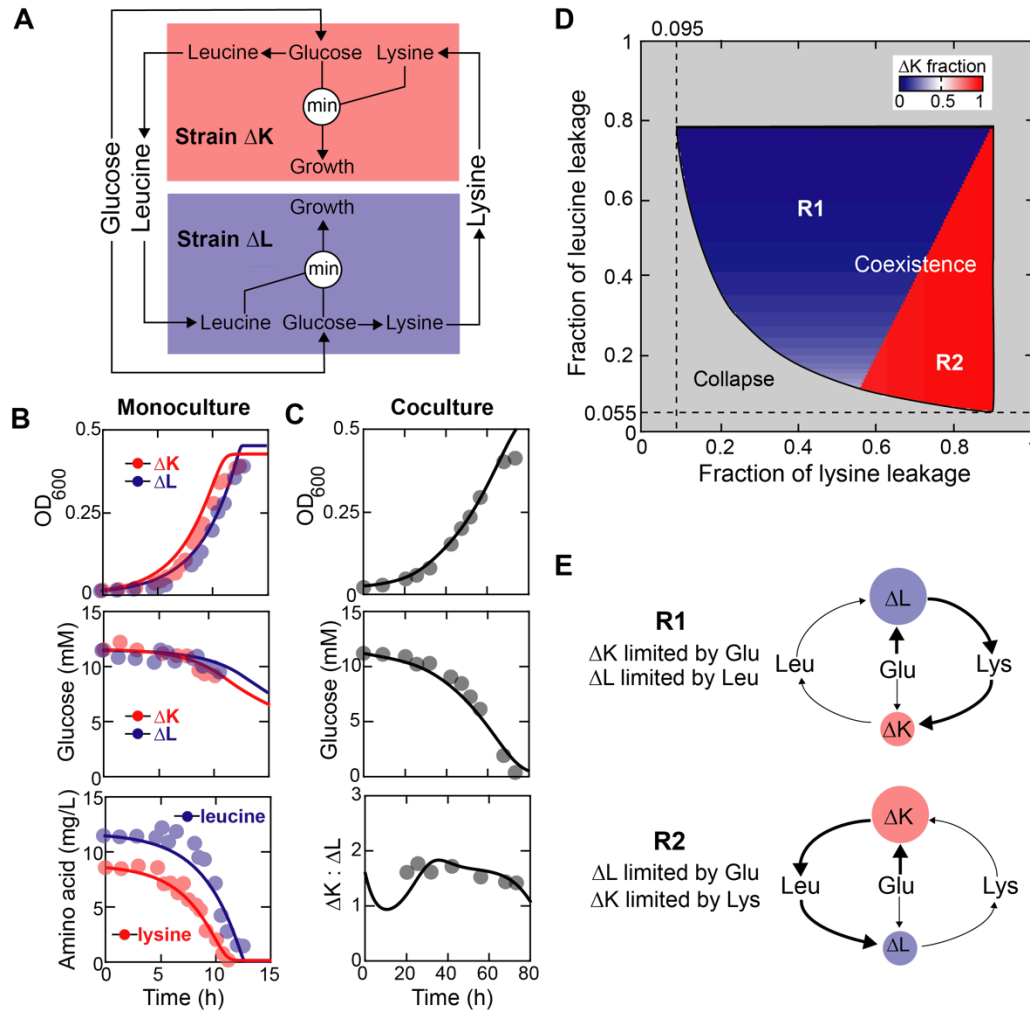

746

747 **Figure 3 | Bilateral cross-feeding between engineered *E. coli* amino acid auxotrophies. (A)**

748 Schematic diagram of the model. The *E. coli* lysine auxotroph ( $\Delta K$ ) and leucine auxotroph ( $\Delta L$ )

749 compete for glucose while additionally acquiring essential amino acids from each other. Growth

750 of each auxotroph is determined by the more limiting resource between glucose and the amino

751 acid it needs to grow. (B,C) Manual model calibration. Circles: data; lines: simulation. (B) 2 g/L

752 glucose-limited batch monoculture supplemented with 10 mg/L amino acids<sup>21</sup>. (C) 2 g/L glucose-

753 limited batch coculture without amino acid supplementation<sup>21</sup>. (D) The simulated steady-state

754 phase diagram. The feed medium glucose concentration is 10 mM. (E) The metabolic strategies

755 adopted by  $\Delta K$  and  $\Delta L$  in the coexistence regime. All chemostat simulations were run at dilution  
756 rate of  $0.1 \text{ h}^{-1}$ .

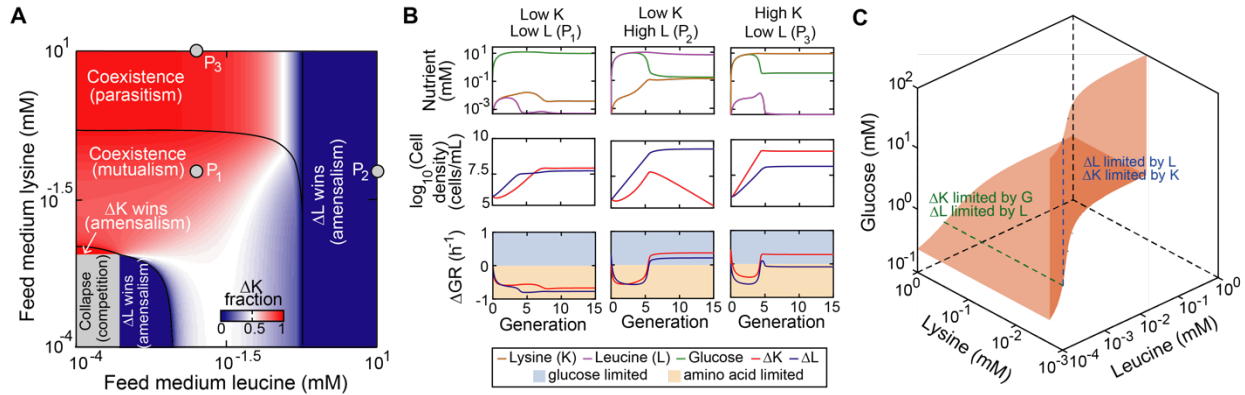

757

758 **Figure 4 | Impacts of amino acid supplementation on ecological relationships between two**

759 **amino acid cross-feeders.** (A) The simulated steady-state phase diagram for different levels of

760 amino acid supplementation. (B) Representative system dynamic trajectories of specific phases in

761 (A).  $\Delta GR$ : the difference between growth rate when set by amino acid as the sole limiting factor

762 and when set by glucose as the sole limiting factor (the minimum of the two determines the actual

763 growth rate). A positive or negative value of  $\Delta GR$  indicates that cell growth is limited by glucose

764 or amino acid respectively. (C) The isosurface of equal net growth rate (growth rate minus

765 mortality rate) between the lysine and leucine auxotrophies. The dashed lines (blue and green)

766 indicate when their net growth rates are equal to  $0.1 \text{ h}^{-1}$  (the dilution rate used throughout the

767 figure). Abbreviations: glucose (G); lysine (K); leucine (L); lysine auxotroph ( $\Delta K$ ); leucine

768 auxotroph ( $\Delta L$ ).

769

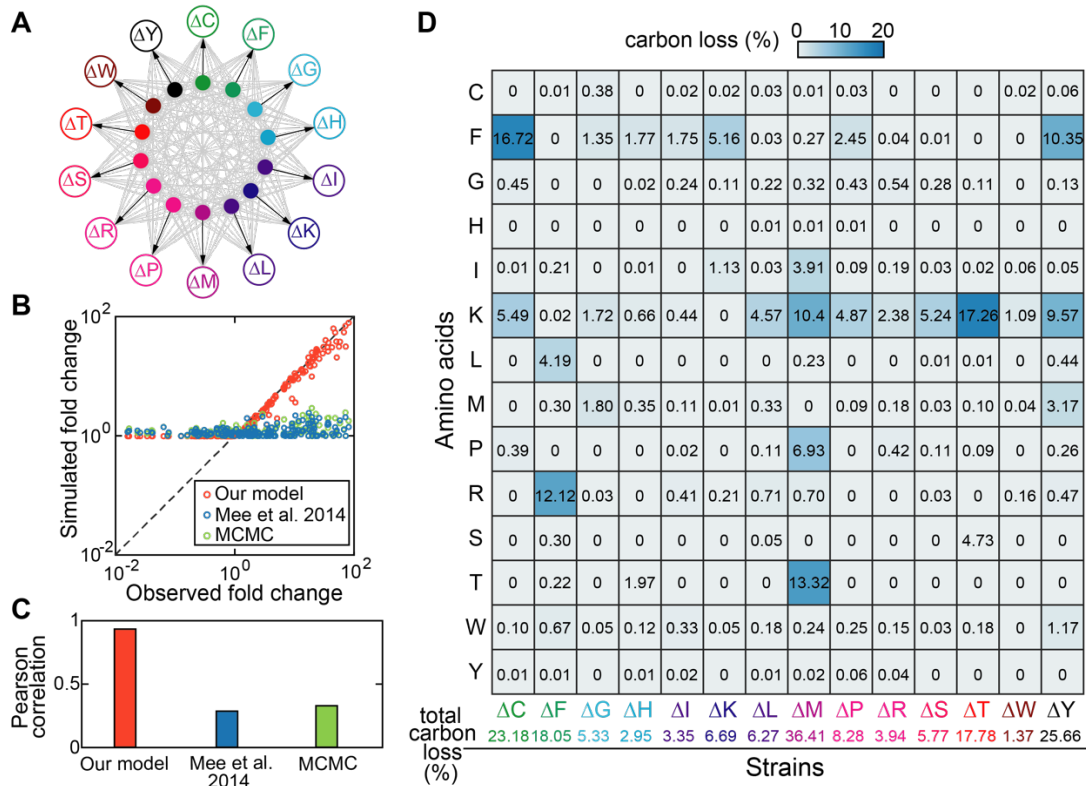

770

771 **Figure 5 | Modeling a consortium of 14 amino acid auxotrophies.** (A) Schematic diagram of

772 the model. Each labeled empty circle represents one amino acid auxotroph and each filled circle

773 with the same color corresponds to the amino acid that it is auxotrophic for. Gray arrows indicate

774 production and release of amino acids to the environment and black arrows indicate the uptake of

775 amino acids by their auxotrophies. (B) Scatter plot (upper panel) and Pearson correlation (bottom

776 panel) between observed<sup>22</sup> and predicted cell density fold changes across all pairwise batch

777 coculture of 14 *E. coli* amino acid auxotrophies. Orange circles: our model with manually curated

778 parameters; Blue circles: a Lotka-Volterra-type model with parameters adopted from Mee *et al.*<sup>22</sup>;

779 Green circles: the same Lotka-Volterra-type model with parameters optimized by Markov-Chain-

780 Monte-Carlo (MCMC) algorithm. (C) Predicted amino acid leakage profiles (converted to

781 percentage of carbon loss) for the 14 amino acid auxotrophies. Each value in the matrix describes

782 the fraction of carbon loss due to release of the amino acid in the row by the auxotroph in the



783 column. Abbreviations: cysteine auxotroph ( $\Delta C$ ), phenylalanine auxotroph ( $\Delta F$ ), glycine  
784 auxotroph ( $\Delta G$ ), histidine auxotroph ( $\Delta H$ ), isoleucine auxotroph ( $\Delta I$ ), lysine auxotroph ( $\Delta K$ ),  
785 leucine auxotroph ( $\Delta L$ ), methionine auxotroph ( $\Delta M$ ), proline auxotroph ( $\Delta P$ ), arginine auxotroph  
786 ( $\Delta R$ ), serine auxotroph ( $\Delta S$ ), threonine auxotroph ( $\Delta T$ ), tryptophan auxotroph ( $\Delta W$ ), and tyrosine  
787 auxotroph ( $\Delta Y$ ).

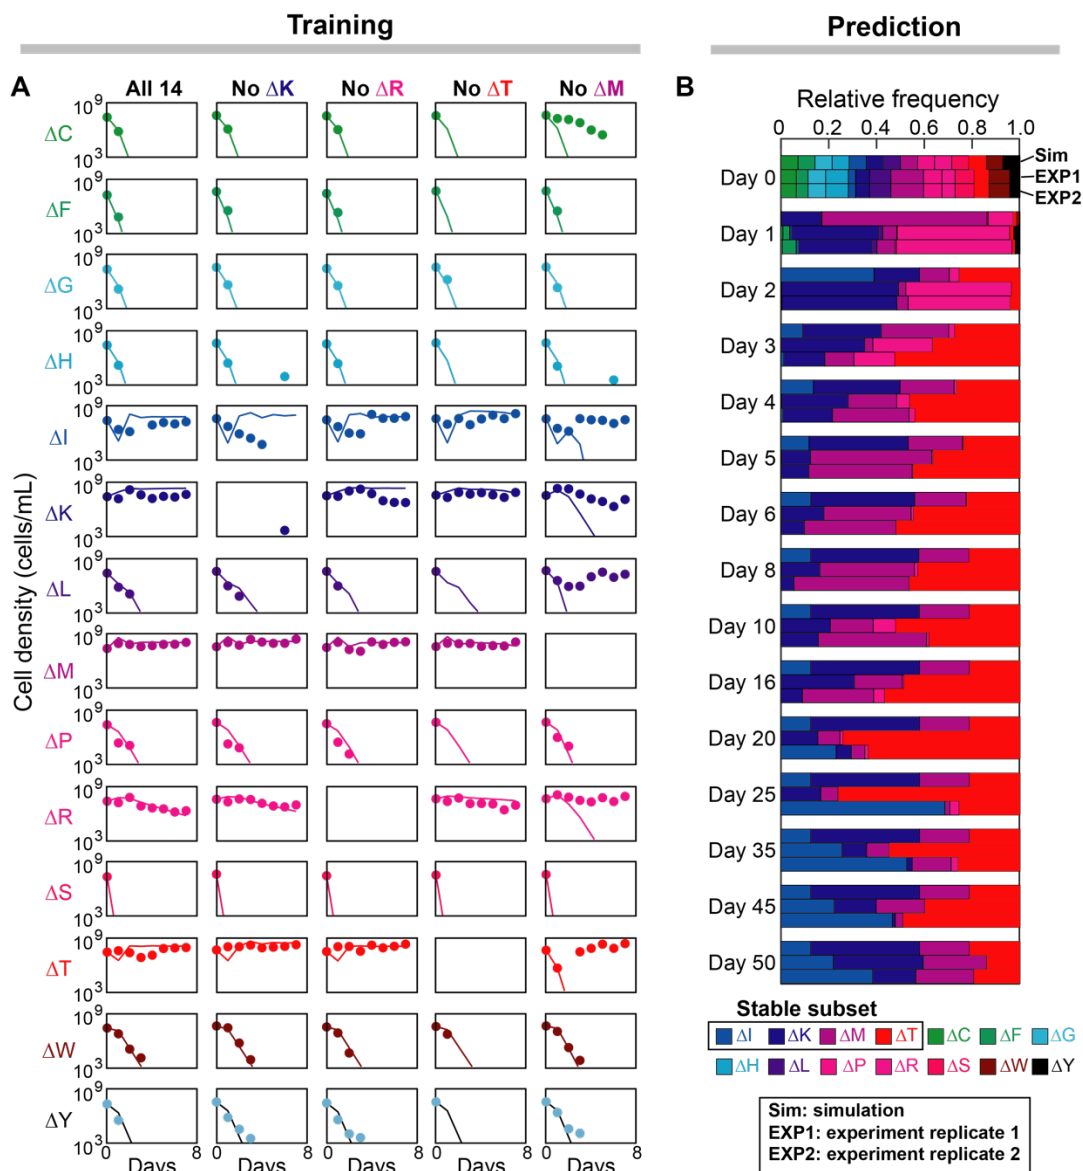

788

789 **Figure 6 | Prediction of the long-term steady state of the community of 14 amino acid**

790 **auxotrophies.** (A) Parameters other than the amino acid leakage fractions (obtained from fitting

791 pairwise coculture data in Fig. 5) were manually optimized from the observed population density

792 during a 7-day 100-fold serial dilution of one 14-auxotroph and four 13-auxotroph communities.

793 Filled circles: experiments<sup>22</sup>; Lines: simulation. (B) Simulation of the trained 14-member model

794 over 50 daily passages of the community into fresh medium. The observed long-term stable

795 coexistence of a four-auxotroph subset ( $\Delta I$ ,  $\Delta K$ ,  $\Delta M$ ,  $\Delta T$ ) was correctly predicted. The two

796 replicates of experimental observations were adopted from Mee *et al.*<sup>22</sup>. See Fig. 5 legend for  
797 abbreviations of the names of amino acid auxotrophies.

798

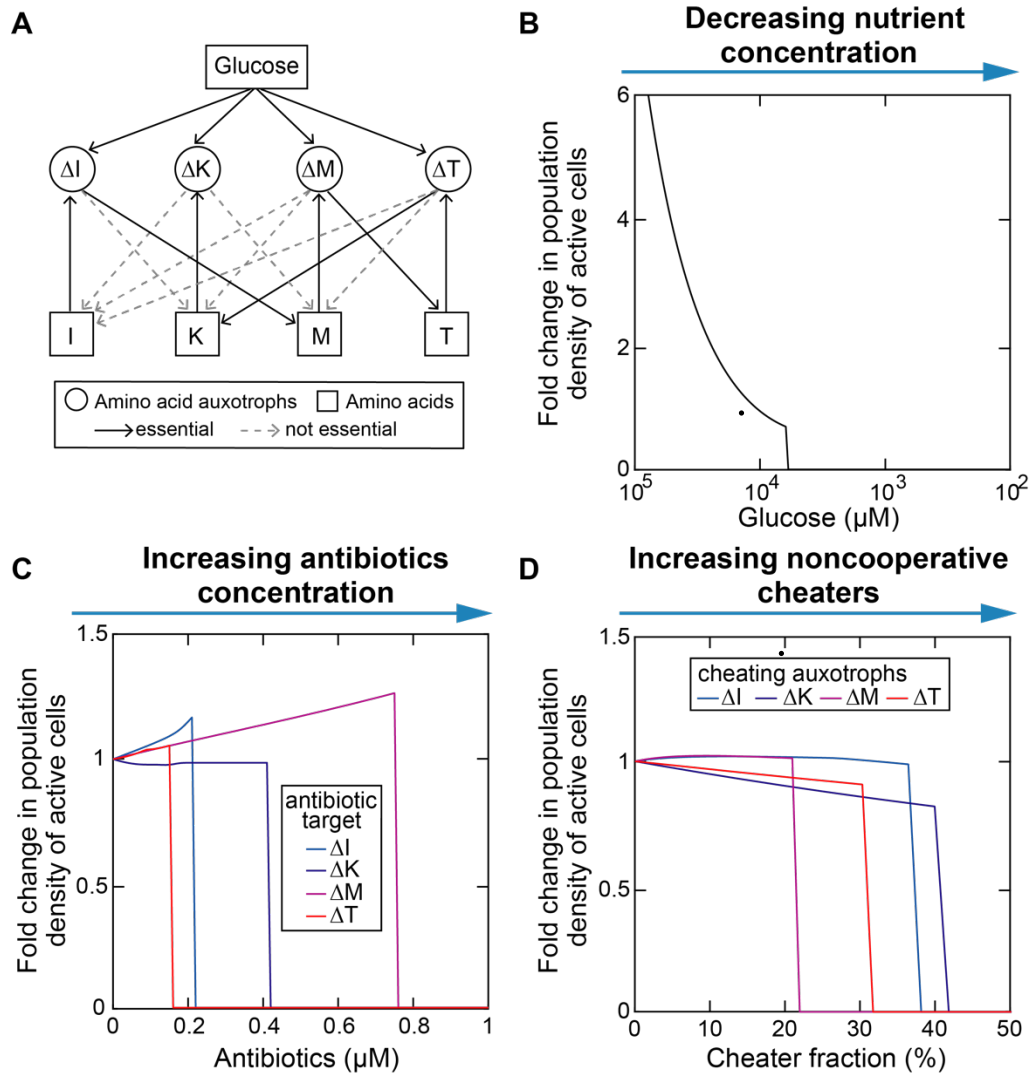

799

800 **Figure 7 | Collapse of mutualistic cross-feeding network following external perturbations.** (A)

801 Bipartite interaction network of the subset of amino acid auxotrophies that stably coexist over

802 long-term serial dilution (see also Fig. 6B). The network contains resource nodes (I, K, M, T for

803 isoleucine, lysine, methionine, and threonine respectively) and consumer nodes ( $\Delta\text{I}$ ,  $\Delta\text{K}$ ,  $\Delta\text{M}$ ,  $\Delta\text{T}$

804 are their corresponding auxotrophies). Each directed link indicates the presence of a resource-

805 consumer relationship whose corresponding parameter value is not zero. An directed link is

806 essential if its removal leads to loss of community members. (B-D) External perturbations,

807 including decreasing nutrient concentration (B), increasing antibiotic concentration (C), and  
808 introducing noncooperative cheaters (D), result in an abrupt collapse of the community when the  
809 perturbation level exceeds a certain threshold.
